# Supplementary material for: In Vivo Transcriptional Profiling of Listeria monocytogenes and Mutagenesis Identify New Virulence Factors Involved in Infection
Source: PubMed Central journal article supplement (PMC2679221; doi:10.1371/journal.ppat.1000449), 2009-05-29
Supplement: ppat.1000449.s001.pdf [file ppat.1000449.s001.pdf]

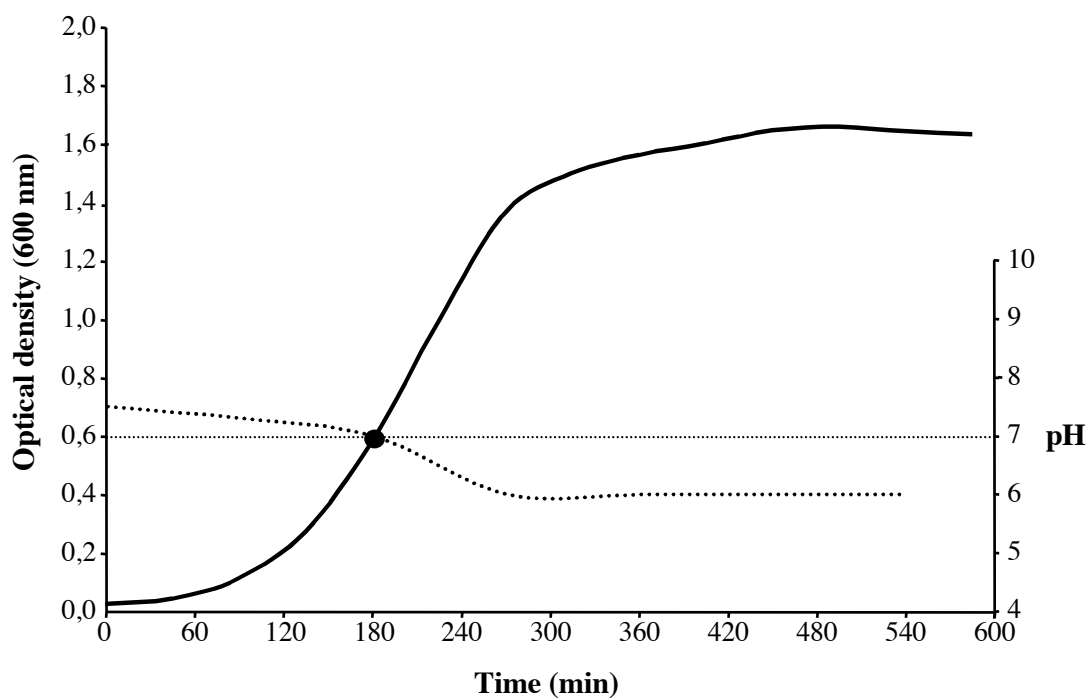

**Figure S1: Growth and pH curves of *L. monocytogenes* EGDe in BHI at 37°C with shaking**

- Growth curve
- ..... pH curve of the medium during bacterial growth
- .....●..... Growth and pH conditions used to prepare *in vitro* RNAs
