# Supplementary material for: In Vivo Transcriptional Profiling of Listeria monocytogenes and Mutagenesis Identify New Virulence Factors Involved in Infection
Source: PubMed Central journal article supplement (PMC2679221; doi:10.1371/journal.ppat.1000449), 2009-05-29
Supplement: ppat.1000449.s002.pdf [file ppat.1000449.s002.pdf]

A

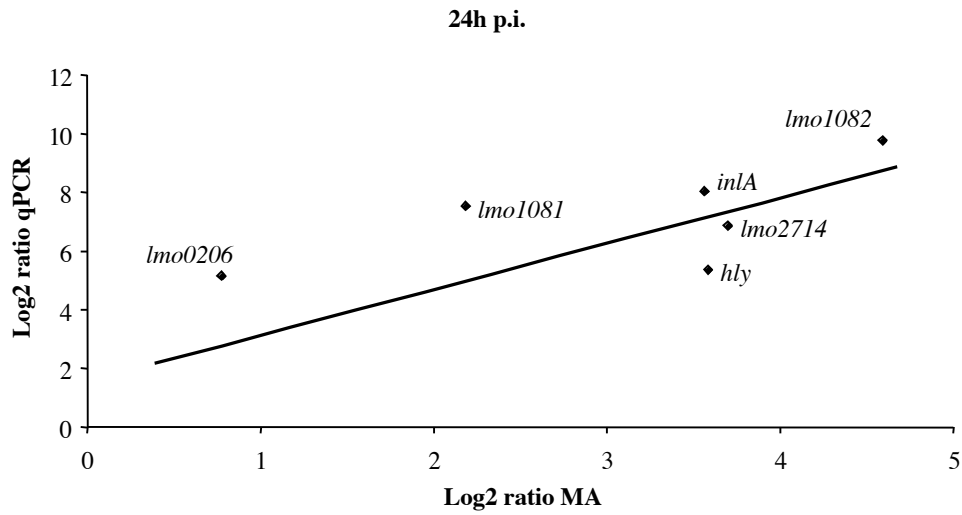

B

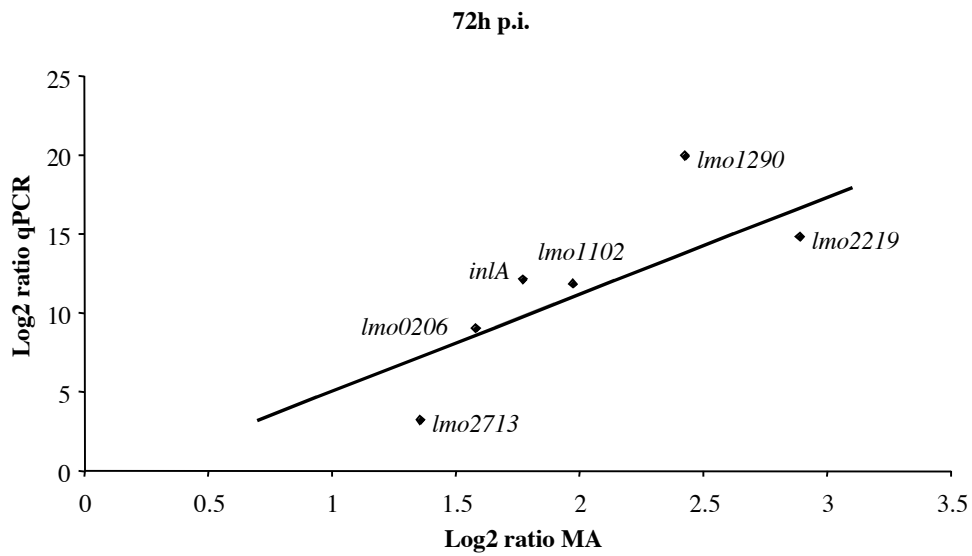

**Figure S2:** Validation of macroarray data by real-time RT-PCR. Fold changes in *in vivo* gene expression 24h p.i. (A) or 72h p.I. (B) compared to that in BHI were measured by macroarray and real-time RT-PCR, log transformed and compared for correlation analysis.
