# Supplementary material for: In Vivo Transcriptional Profiling of Listeria monocytogenes and Mutagenesis Identify New Virulence Factors Involved in Infection
Source: PubMed Central journal article supplement (PMC2679221; doi:10.1371/journal.ppat.1000449), 2009-05-29
Supplement: ppat.1000449.s003.pdf [file ppat.1000449.s003.pdf]

**Table S1.** Known *L. monocytogenes* virulence factors

| Gene designation | Gene    | Reference                                                                                                                                                                                                                                                                                      |
|------------------|---------|------------------------------------------------------------------------------------------------------------------------------------------------------------------------------------------------------------------------------------------------------------------------------------------------|
| ctsR             | Imo0229 | Karatzas KA, Wouters JA, Gahan CG, Hill C, Abee T, Bennis MH. Mol Microbiol. 2003;49(5):1227-38.                                                                                                                                                                                               |
| Imo0135          | Imo0135 | Port GC, Freitag NE. Infect Immun. 2007;75(12):5886-97.                                                                                                                                                                                                                                        |
| agrA             | Imo0051 | Autret N, Raynaud C, Dubail I, Berche P, Charbit A. Infect Immun. 2003;71(8):4463-71.                                                                                                                                                                                                          |
| actA             | Imo0204 | Kocks C, Gouin E, Tabouret M, Berche P, Ohayon H, Cossart P. 1992. Cell 68:521-531. Domann E, Wehland J, Rohde M, Pistor S, Hartl M, Goebel W, Leimeister-Wächter M, Wuenscher M, Chakraborty T. EMBO J. 1992; 11(5):1981-90.                                                                  |
| ami              | Imo2558 | Milohanic E, Jonquière R, Cossart P, Berche P, Gaillard JL. Mol Microbiol. 2001;39(5):1212-24.                                                                                                                                                                                                 |
| aut              | Imo1076 | Cabanes D, Dussurget O, Dehoux P, Cossart P. Mol Microbiol. 2004;51(6):1601-14.                                                                                                                                                                                                                |
| bilE             | Imo1421 | Sleator RD, Wemekamp-Kamphuis HH, Gahan CG, Abee T, Hill C. Mol Microbiol. 2005;55(4):1183-95.                                                                                                                                                                                                 |
| bsn              | Imo2067 | Dussurget O, Cabanes D, Dehoux P, Lecuit M, Buchrieser C, Glaser P, Cossart P. Mol Microbiol. 2002;45(4):1095-106.                                                                                                                                                                             |
| clpB             | Imo2206 | Chastanet A, Derre I, Nair S, Msadek T. J Bacteriol. 2004;186(4):1165-74.                                                                                                                                                                                                                      |
| degU             | Imo2515 | Knudsen GM, Olsen JE, Dons L. FEMS Microbiol Lett. 2004;240(2):171-9.                                                                                                                                                                                                                          |
| ditA             | Imo0974 | Abachin E, Poyart C, Pellegrini E, Milohanic E, Fiedler F, Berche P, Trieu-Cuot P. Mol Microbiol. 2002;43(1):1-14.                                                                                                                                                                             |
| fbpA             | Imo1829 | Dramsi S, Bourdichon F, Cabanes D, Lecuit M, Fsihi H, Cossart P. Mol Microbiol. 2004;53(2):639-49.                                                                                                                                                                                             |
| fri              | Imo0943 | Dussurget O, Dumas E, Archambaud C, Chafsey I, Chambon C, Hébraud M, Cossart P. FEMS Microbiol Lett. 2005;250(2):253-61                                                                                                                                                                        |
| fur              | Imo1956 | Rea RB, Gahan CG, Hill C. Infect Immun. 2004;72(2):717-27                                                                                                                                                                                                                                      |
| hfq              | Imo1295 | Christiansen JK, Larsen MH, Ingmer H, Søgaard-Andersen L, Kallipolitis BH. J Bacteriol. 2004;186(11):3355-62.                                                                                                                                                                                  |
| hly              | Imo0202 | Gaillard JL, Berche P, Sansonetti P. Infect Immun. 1986;52(1):50-5.                                                                                                                                                                                                                            |
| htrA             | Imo0292 | Stack HM, Sleator RD, Bowers M, Hill C, Gahan CG. Appl Environ Microbiol. 2005;71(8):4241-7.                                                                                                                                                                                                   |
| iap              | Imo0582 | Pilgrim S, Kolb-Maurer A, Gentschev I, Goebel W, Kuhn M. 2003; Infect. Immun. 71:3473-3484.                                                                                                                                                                                                    |
| inlA             | Imo0433 | Gaillard JL, Berche P, Frehel C, Gouin E, Cossart P. Cell. 1991;65(7):1127-41. Lecuit M, Vandormael-Pourmin S, Lefort J, Huerre M, Gounon P, Dupuy C, Babinet C, Cossart P. Science. 2001;292(5522):1722-5.                                                                                    |
| inlB             | Imo0434 | Dramsi S, Bourdichon F, Cabanes D, Lecuit M, Fsihi H, Cossart P. Mol Microbiol. 2004;53(2):639-49.                                                                                                                                                                                             |
| inlC             | Imo1786 | Engelbrecht F, Chun SK, Ochs C, Hess J, Lottspeich F, Goebel W, Sokolovic Z. Mol Microbiol. 1996;21(4):823-37.                                                                                                                                                                                 |
| inlH             | Imo0263 | Schubert WD, Göbel G, Diepholz M, Darji A, Kloer D, Hain T, Chakraborty T, Wehland J, Domann E, Heinz DW. J Mol Biol. 2001;312(4):783-94.                                                                                                                                                      |
| inlJ             | Imo2821 | Sabet C, Lecuit M, Cabanes D, Cossart P, Bierné H. Infect Immun. 2005;73(10):6912-22.                                                                                                                                                                                                          |
| Imo2026          | Imo2026 | Autret N, Dubail I, Trieu-Cuot P, Berche P, Charbit A. Infect Immun. 2001;69(4):2054-65.                                                                                                                                                                                                       |
| lplA1            | Imo0931 | O'Riordan M, Moors MA, Portnoy DA. Science. 2003;302(5644):462-4.                                                                                                                                                                                                                              |
| mogR             | Imo0674 | Gründling A, Burrack LS, Bouwer HG, Higgins DE. Proc Natl Acad Sci U S A. 2004;101(33):12318-23.                                                                                                                                                                                               |
| mpl              | Imo0203 | Raveneau J, Geoffroy C, Beretti JL, Gaillard JL, Alouf JE, Berche P. Infect Immun. 1992;60(3):916-21. Vazquez-Boland JA, Kocks C, Dramsi S, Ohayon H, Geoffroy C, Mengaud J, Cossart P. Infect Immun. 1992;60(1):219-30.                                                                       |
| mprF             | Imo1695 | Thedieck K, Hain T, Mohamed W, Tindall BJ, Nimtz M, Chakraborty T, Wehland J, Jänsch L. Mol Microbiol. 2006;62(5):1325-39.                                                                                                                                                                     |
| murA             | Imo2691 | Lenz LL, Mohammadi S, Geissler A, Portnoy DA. Proc Natl Acad Sci U S A. 2003;100(21):12432-7.                                                                                                                                                                                                  |
| oppA             | Imo2196 | Borezee E, Pellegrini E, Berche P. Infect Immun. 2000;68(12):7069-77.                                                                                                                                                                                                                          |
| perR             | Imo1683 | Rea RB, Gahan CG, Hill C. Infect Immun. 2004;72(2):717-27                                                                                                                                                                                                                                      |
| pgdA             | Imo0415 | Boneca IG, Dussurget O, Cabanes D, Nahori MA, Sousa S, Lecuit M, Psylinakis E, Bouriotis V, Hugot JP, Giovannini M, Coyle A, Bertin J, Namane A, Rousselle JC, Cayet N, Prévost MC, Balloy V, Chignard M, Philpott DJ, Cossart P, Girardin SE. Proc Natl Acad Sci U S A. 2007;104(3):997-1002. |
| plcA             | Imo0201 | Mengaud J, Braun-Breton C, Cossart P. Mol Microbiol. 1991;5(2):367-72. Camilli A, Goldfine H, Portnoy DA. 1991. J. Exp. Med. 173:751-754.                                                                                                                                                      |
| plcB             | Imo0205 | Vazquez-Boland JA, Kocks C, Dramsi S, Ohayon H, Geoffroy C, Mengaud J, Cossart P. 1992. Infect. Immun. 60:219-230.                                                                                                                                                                             |
| prfA             | Imo0200 | Chakraborty T, Leimeister-Wächter M, Domann E, Hartl M, Goebel W, Nichterlein T, Notermans S. J Bacteriol. 1992;174(2):568-74.                                                                                                                                                                 |
| prsA2            | Imo2219 | Port GC, Freitag NE. Infect Immun. 2007;75(12):5886-97.                                                                                                                                                                                                                                        |
| relA             | Imo1523 | Taylor CM, Beresford M, Epton HA, Sigee DC, Shama G, Andrew PW, Roberts IS. J Bacteriol. 2002;184(3):621-8.                                                                                                                                                                                    |
| secA2            | Imo0583 | Lenz LL, Mohammadi S, Geissler A, Portnoy DA. Proc Natl Acad Sci U S A. 2003;100(21):12432-7.                                                                                                                                                                                                  |
| sigB             | Imo0895 | Garner MR, Njaa BL, Wiedmann M, Boor KJ. Infect Immun. 2006;74(2):876-86.                                                                                                                                                                                                                      |
| sipX             | Imo1269 | Bonnemain C, Raynaud C, Réglier-Poupet H, Dubail I, Frehel C, Lety MA, Berche P, Charbit A. Mol Microbiol. 2004;51(5):1251-66.                                                                                                                                                                 |
| sipZ             | Imo1271 | Bonnemain C, Raynaud C, Réglier-Poupet H, Dubail I, Frehel C, Lety MA, Berche P, Charbit A. Mol Microbiol. 2004;51(5):1251-66.                                                                                                                                                                 |
| sod              | Imo1439 | Archambaud C, Nahori MA, Pizarro-Cerda J, Cossart P, Dussurget O. J Biol Chem. 2006;281(42):31812-22.                                                                                                                                                                                          |
| srta             | Imo0929 | Bierné H, Mazmanian SK, Trost M, Pucciarelli MG, Liu G, Dehoux P, Jänsch L, Garcia-del Portillo F, Schneewind O, Cossart P. Mol Microbiol. 2002;43(4):869-81.                                                                                                                                  |
| stp              | Imo1821 | Archambaud C, Gouin E, Pizarro-Cerda J, Cossart P, Dussurget O. Mol Microbiol. 2005;56(2):383-96.                                                                                                                                                                                              |
| svpA             | Imo2185 | Borezee E, Pellegrini E, Beretti JL, Berche P. Microbiology. 2001;147(Pt 11):2913-23.                                                                                                                                                                                                          |
| tcsA             | Imo1388 | Port GC, Freitag NE. Infect Immun. 2007;75(12):5886-97.                                                                                                                                                                                                                                        |
| tig              | Imo1267 | Bigot A, Botton E, Dubail I, Charbit A. Appl Environ Microbiol. 2006;72(10):6623-31.                                                                                                                                                                                                           |
| uhpT             | Imo0838 | Chico-Calero I, Suárez M, González-Zorn B, Scotti M, Slaghuys J, Goebel W, Vázquez-Boland JA. Proc Natl Acad Sci U S A. 2002;99(1):431-6.                                                                                                                                                      |
| vip              | Imo0320 | Cabanes D, Sousa S, Cebriá A, Lecuit M, García-del Portillo F, Cossart P. EMBO J. 2005;24(15):2827-38.                                                                                                                                                                                         |
| virR             | Imo1745 | Mandin P, Fsihi H, Dussurget O, Vergassola M, Milohanic E, Toledo-Arana A, Lasa I, Johansson J, Cossart P. Mol Microbiol. 2005;57(5):1367-80.                                                                                                                                                  |

Red: Genes up-regulated *in vivo*Green: Genes down-regulated *in vivo*Black: Genes not differentially regulated *in vivo*
