# Supplementary material for: In Vivo Transcriptional Profiling of Listeria monocytogenes and Mutagenesis Identify New Virulence Factors Involved in Infection
Source: PubMed Central journal article supplement (PMC2679221; doi:10.1371/journal.ppat.1000449), 2009-05-29
Supplement: ppat.1000449.s004.pdf [file ppat.1000449.s004.pdf]

**Table S2.** *L. monocytogenes* EGDe genes regulated in the host, as compared to exponential or stationary growth phase in BHI

| Genes up regulated in the host, as compared to: |         |                                |         | Genes down regulated in the host, as compared to: |         |                                |         |
|-------------------------------------------------|---------|--------------------------------|---------|---------------------------------------------------|---------|--------------------------------|---------|
| Exponential growth phase in BHI                 |         | Stationary growth phase in BHI |         | Exponential growth phase in BHI                   |         | Stationary growth phase in BHI |         |
| Gene designation                                | Gene    | Gene designation               | Gene    | Gene designation                                  | Gene    | Gene designation               | Gene    |
| dnaA                                            | lmo0001 | dnaN                           | lmo0002 | lmo0023                                           | lmo0023 | lmo0008                        | lmo0008 |
| RecF                                            | lmo0005 | RecF                           | lmo0005 | lmo0024                                           | lmo0024 | lmo0020                        | lmo0020 |
| gyrA                                            | lmo0007 | gyrA                           | lmo0007 | lmo0032                                           | lmo0032 | lmo0034                        | lmo0034 |
| lmo0010                                         | lmo0010 | lmo0010                        | lmo0010 | lmo0033                                           | lmo0033 | rpsF                           | lmo0044 |
| lmo0011                                         | lmo0011 | lmo0011                        | lmo0011 | lmo0391                                           | lmo0391 | lmo0078                        | lmo0078 |
| lmo0012                                         | lmo0012 | lmo0012                        | lmo0012 | lmo0393                                           | lmo0393 | lmo0080                        | lmo0080 |
| qoxA                                            | lmo0013 | qoxA                           | lmo0013 | lmo0496                                           | lmo0496 | lmo0081                        | lmo0081 |
| qoxB                                            | lmo0014 | qoxB                           | lmo0014 | lmo0681                                           | lmo0681 | lmo0087                        | lmo0087 |
| qoxD                                            | lmo0016 | qoxC                           | lmo0015 | lmo0697                                           | lmo0697 | lmo0088                        | lmo0088 |
| ssb                                             | lmo0045 | lmo0019                        | lmo0019 | lmo1142                                           | lmo1142 | lmo0093                        | lmo0093 |
| rpsR                                            | lmo0046 | lmo0025                        | lmo0025 | lmo1143                                           | lmo1143 | lmo0094                        | lmo0094 |
| rplI                                            | lmo0053 | lmo0031                        | lmo0031 | lmo1144                                           | lmo1144 | lmo0102                        | lmo0102 |
| dnaC                                            | lmo0054 | lmo0042                        | lmo0042 | lmo1145                                           | lmo1145 | lmo0105                        | lmo0105 |
| purA                                            | lmo0055 | spl                            | lmo0045 | lmo1146                                           | lmo1146 | lmo0113                        | lmo0113 |
| lmo0098                                         | lmo0098 | rpsR                           | lmo0046 | lmo1147                                           | lmo1147 | lmaC                           | lmo0116 |
| lmo0150                                         | lmo0150 | lmo0050                        | lmo0050 | lmo1148                                           | lmo1148 | lmo0128                        | lmo0128 |
| lmo0153                                         | lmo0153 | lmo0052                        | lmo0052 | lmo1149                                           | lmo1149 | lmo0130                        | lmo0130 |
| lmo0158                                         | lmo0158 | rplI                           | lmo0053 | lmo1150                                           | lmo1150 | lmo0134                        | lmo0134 |
| lmo0161                                         | lmo0161 | purA                           | lmo0055 | lmo1151                                           | lmo1151 | lmo0136                        | lmo0136 |
| lmo0162                                         | lmo0162 | lmo0063                        | lmo0063 | lmo1152                                           | lmo1152 | lmo0140                        | lmo0140 |
| lmo0165                                         | lmo0165 | lmo0065                        | lmo0065 | lmo1153                                           | lmo1153 | lmo0142                        | lmo0142 |
| lmo0169                                         | lmo0169 | lmo0067                        | lmo0067 | lmo1154                                           | lmo1154 | lmo0143                        | lmo0143 |
| lmo0189                                         | lmo0189 | lmo0098                        | lmo0098 | lmo1156                                           | lmo1156 | lmo0144                        | lmo0144 |
| lmo0190                                         | lmo0190 | lmo0109                        | lmo0109 | lmo1157                                           | lmo1157 | lmo0146                        | lmo0146 |
| lmo0196                                         | lmo0196 | lmo0119                        | lmo0119 | lmo1158                                           | lmo1158 | lmo0154                        | lmo0154 |
| prfA                                            | lmo0200 | lmo0125                        | lmo0125 | lmo1159                                           | lmo1159 | lmo0155                        | lmo0155 |
| plcA                                            | lmo0201 | lmo0137                        | lmo0137 | lmo1160                                           | lmo1160 | lmo0156                        | lmo0156 |
| hly                                             | lmo0202 | lmo0150                        | lmo0150 | lmo1161                                           | lmo1161 | lmo0157                        | lmo0157 |
| mpl                                             | lmo0203 | lmo0158                        | lmo0158 | lmo1162                                           | lmo1162 | lmo0161                        | lmo0161 |
| actA                                            | lmo0204 | lmo0162                        | lmo0162 | lmo1164                                           | lmo1164 | lmo0163                        | lmo0163 |
| plcB                                            | lmo0205 | lmo0169                        | lmo0169 | lmo1165                                           | lmo1165 | lmo0166                        | lmo0166 |
| lmo0206                                         | lmo0206 | lmo0178                        | lmo0178 | lmo1166                                           | lmo1166 | lmo0171                        | lmo0171 |
| lmo0207                                         | lmo0207 | lmo0190                        | lmo0190 | glpF                                              | lmo1167 | lmo0174                        | lmo0174 |
| lmo0208                                         | lmo0208 | lmo0196                        | lmo0196 | AckA2                                             | lmo1168 | lmo0175                        | lmo0175 |
| ctc                                             | lmo0211 | prfA                           | lmo0200 | cobD                                              | lmo1169 | lmo0179                        | lmo0179 |
| lmo0216                                         | lmo0216 | plcA                           | lmo0201 | lmo1170                                           | lmo1170 | lmo0184                        | lmo0184 |
| ftsH                                            | lmo0220 | hly                            | lmo0202 | pduQ                                              | lmo1171 | lmo0185                        | lmo0185 |
| lmo0222                                         | lmo0222 | mpl                            | lmo0203 | lmo1172                                           | lmo1172 | lmo0186                        | lmo0186 |
| sul                                             | lmo0224 | actA                           | lmo0204 | lmo1173                                           | lmo1173 | prs                            | lmo0199 |
| folA                                            | lmo0225 | plcB                           | lmo0205 | eutA                                              | lmo1174 | lmo0212                        | lmo0212 |
| folK                                            | lmo0226 | lmo0208                        | lmo0208 | eutB                                              | lmo1175 | lmo0215                        | lmo0215 |
| lmo0227                                         | lmo0227 | ctc                            | lmo0211 | eutC                                              | lmo1176 | lmo0219                        | lmo0219 |
| lysS                                            | lmo0228 | lmo0216                        | lmo0216 | lmo1177                                           | lmo1177 | lmo0234                        | lmo0234 |
| lmo0230                                         | lmo0230 | lmo0218                        | lmo0218 | lmo1180                                           | lmo1180 | rplI                           | lmo0251 |
| lmo0231                                         | lmo0231 | ftsH                           | lmo0220 | lmo1181                                           | lmo1181 | lmo0252                        | lmo0252 |
| clpC                                            | lmo0232 | ssb                            | lmo0224 | lmo1182                                           | lmo1182 | rpoB                           | lmo0258 |
| lmo0236                                         | lmo0236 | lmo0227                        | lmo0227 | cbiA                                              | lmo1191 | lmo0270                        | lmo0270 |
| gltx                                            | lmo0237 | lysS                           | lmo0228 | lmo1192                                           | lmo1192 | lmo0274                        | lmo0274 |
| secE                                            | lmo0245 | lmo0231                        | lmo0231 | cbiD                                              | lmo1194 | lmo0277                        | lmo0277 |
| nusG                                            | lmo0246 | clpC                           | lmo0232 | lmo1728                                           | lmo1728 | lmo0280                        | lmo0280 |
| rplK                                            | lmo0248 | lmo0236                        | lmo0236 | lmo1812                                           | lmo1812 | lmo0281                        | lmo0281 |
| rplA                                            | lmo0249 | gltx                           | lmo0237 | lmo1817                                           | lmo1817 | lmo0284                        | lmo0284 |
| rplJ                                            | lmo0250 | cysE                           | lmo0238 | lmo1818                                           | lmo1818 | lmo0285                        | lmo0285 |
| rplI                                            | lmo0251 | lmo0242                        | lmo0242 | lmo1819                                           | lmo1819 | lmo0286                        | lmo0286 |
| lmo0257                                         | lmo0257 | nusG                           | lmo0246 | lmo1821                                           | lmo1821 | lmo0288                        | lmo0288 |
| rpoC                                            | lmo0259 | rplK                           | lmo0248 | lmo1822                                           | lmo1822 | lmo0293                        | lmo0293 |
| inlH                                            | lmo0263 | rplA                           | lmo0249 | fnt                                               | lmo1823 | lmo0296                        | lmo0296 |
| lmo0265                                         | lmo0265 | rplJ                           | lmo0250 | prfA                                              | lmo1824 | lmo0300                        | lmo0300 |
| lmo0278                                         | lmo0278 | lmo0257                        | lmo0257 | lmo1825                                           | lmo1825 | lmo0301                        | lmo0301 |
| lmo0279                                         | lmo0279 | rpoC                           | lmo0259 | lmo1828                                           | lmo1828 | lmo0302                        | lmo0302 |
| lmo0280                                         | lmo0280 | inlH                           | lmo0263 | lmo1829                                           | lmo1829 | lmo0304                        | lmo0304 |
| lmo0301                                         | lmo0301 | lmo0265                        | lmo0265 | lmo1830                                           | lmo1830 | lmo0305                        | lmo0305 |
| lmo0303                                         | lmo0303 | lmo0273                        | lmo0273 | pyrE                                              | lmo1831 | lmo0310                        | lmo0310 |
| lmo0355                                         | lmo0355 | lmo0278                        | lmo0278 | pyrF                                              | lmo1832 | lmo0315                        | lmo0315 |
| lmo0366                                         | lmo0366 | lmo0279                        | lmo0279 | pyrD                                              | lmo1833 | lmo0316                        | lmo0316 |
| lmo0368                                         | lmo0368 | lmo0311                        | lmo0311 | pyrDII                                            | lmo1834 | lmo0319                        | lmo0319 |
| lmo0369                                         | lmo0369 | lmo0355                        | lmo0355 | pyrAB                                             | lmo1835 | lmo0334                        | lmo0334 |
| lmo0370                                         | lmo0370 | lmo0365                        | lmo0365 | pyrAa                                             | lmo1836 | lmo0338                        | lmo0338 |
| lmo0408                                         | lmo0408 | lmo0366                        | lmo0366 | pyrC                                              | lmo1837 | lmo0340                        | lmo0340 |
| lmo0411                                         | lmo0411 | lmo0368                        | lmo0368 | pyrP                                              | lmo1839 | lmo0374                        | lmo0374 |
| lmo0415                                         | lmo0415 | lmo0369                        | lmo0369 | lsp                                               | lmo1844 | lmo0386                        | lmo0386 |
| lmo0422                                         | lmo0422 | lmo0370                        | lmo0370 | lmo1845                                           | lmo1845 | lmo0419                        | lmo0419 |
| inlA                                            | lmo0433 | lmo0380                        | lmo0380 | lmo1851                                           | lmo1851 | lmo0426                        | lmo0426 |
| inlB                                            | lmo0434 | lmo0384                        | lmo0384 | lmo1869                                           | lmo1869 | lmo0432                        | lmo0432 |
| lmo0439                                         | lmo0439 | lmo0391                        | lmo0391 | lmo1871                                           | lmo1871 | lmo0445                        | lmo0445 |
| lmo0443                                         | lmo0443 | lmo0393                        | lmo0393 | lmo1872                                           | lmo1872 | lmo0446                        | lmo0446 |
| lmo0452                                         | lmo0452 | lmo0410                        | lmo0410 | lmo1883                                           | lmo1883 | lmo0447                        | lmo0447 |
| lmo0471                                         | lmo0471 | lmo0415                        | lmo0415 | lmo2175                                           | lmo2175 | lmo0448                        | lmo0448 |
| lmo0481                                         | lmo0481 | lmo0420                        | lmo0420 | lmo2257                                           | lmo2257 | lmo0449                        | lmo0449 |
| lmo0483                                         | lmo0483 | lmo0422                        | lmo0422 | lmo2276                                           | lmo2276 | lmo0454                        | lmo0454 |
| lmo0484                                         | lmo0484 | lmo0428                        | lmo0428 | lmo2425                                           | lmo2425 | lmo0455                        | lmo0455 |
| rpmF                                            | lmo0486 | inlA                           | lmo0433 | lmo2432                                           | lmo2432 | lmo0456                        | lmo0456 |
| prs                                             | lmo0509 | inlB                           | lmo0434 | lmo2437                                           | lmo2437 | lmo0457                        | lmo0457 |
| lmo0512                                         | lmo0512 | lmo0439                        | lmo0439 | lmo2454                                           | lmo2454 | lmo0458                        | lmo0458 |
| lmo0516                                         | lmo0516 | lmo0481                        | lmo0481 | lmo2574                                           | lmo2574 | lmo0459                        | lmo0459 |
| lmo0539                                         | lmo0539 | lmo0483                        | lmo0483 | lmo2583                                           | lmo2583 | lmo0460                        | lmo0460 |
| lmo0540                                         | lmo0540 | rpmF                           | lmo0486 | lmo2586                                           | lmo2586 | lmo0462                        | lmo0462 |
| lmo0541                                         | lmo0541 | lmo0494                        | lmo0494 | lmo2642                                           | lmo2642 | lmo0463                        | lmo0463 |
| lmo0558                                         | lmo0558 | lmo0505                        | lmo0505 | lmo2644                                           | lmo2644 | lmo0464                        | lmo0464 |
| lmo0580                                         | lmo0580 | prs                            | lmo0509 | lmo2645                                           | lmo2645 | lmo0465                        | lmo0465 |
| iap                                             | lmo0582 | lmo0512                        | lmo0512 | lmo2646                                           | lmo2646 | lmo0467                        | lmo0467 |
| lmo0583                                         | lmo0583 | lmo0516                        | lmo0516 | lmo2648                                           | lmo2648 | lmo0468                        | lmo0468 |
| lmo0584                                         | lmo0584 | lmo0525                        | lmo0525 | lmo2649                                           | lmo2649 | lmo0474                        | lmo0474 |
| lmo0590                                         | lmo0590 | lmo0530                        | lmo0530 | lmo2657                                           | lmo2657 | lmo0479                        | lmo0479 |
| lmo0592                                         | lmo0592 | lmo0539                        | lmo0539 | lmo2660                                           | lmo2660 | lmo0480                        | lmo0480 |

|         |         |         |         |         |         |         |         |
|---------|---------|---------|---------|---------|---------|---------|---------|
| lmo0593 | lmo0593 | lmo0541 | lmo0541 | lmo2661 | lmo2661 | rpmF    | lmo0486 |
| lmo0594 | lmo0594 | lmo0542 | lmo0542 | lmo2662 | lmo2662 | lmo0487 | lmo0487 |
| lmo0596 | lmo0596 | lmo0553 | lmo0553 | lmo2663 | lmo2663 | lmo0488 | lmo0488 |
| lmo0597 | lmo0597 | lmo0557 | lmo0557 | lmo2664 | lmo2664 | lmo0490 | lmo0490 |
| lmo0599 | lmo0599 | lmo0558 | lmo0558 | lmo2665 | lmo2665 | lmo0497 | lmo0497 |
| lmo0600 | lmo0600 | lmo0559 | lmo0559 | lmo2669 | lmo2669 | lmo0498 | lmo0498 |
| lmo0601 | lmo0601 | lmo0560 | lmo0560 | lmo2672 | lmo2672 | lmo0499 | lmo0499 |
| lmo0604 | lmo0604 | hisH    | lmo0565 | lmo2674 | lmo2674 | lmo0500 | lmo0500 |
| lmo0606 | lmo0606 | hisD    | lmo0567 | lmo2676 | lmo2676 | lmo0501 | lmo0501 |
| lmo0607 | lmo0607 | lmo0577 | lmo0577 | kdpB    | lmo2681 | lmo0503 | lmo0503 |
| lmo0608 | lmo0608 | lmo0581 | lmo0581 | lmo2733 | lmo2733 | lmo0504 | lmo0504 |
| lmo0609 | lmo0609 | iap     | lmo0582 | lmo2736 | lmo2736 | lmo0506 | lmo0506 |
| lmo0611 | lmo0611 | lmo0583 | lmo0583 | lmo2741 | lmo2741 | lmo0507 | lmo0507 |
| lmo0612 | lmo0612 | lmo0584 | lmo0584 | lmo2759 | lmo2759 | lmo0508 | lmo0508 |
| lmo0618 | lmo0618 | lmo0589 | lmo0589 | lmo2761 | lmo2761 | lmo0510 | lmo0510 |
| lmo0619 | lmo0619 | lmo0590 | lmo0590 | lmo2763 | lmo2763 | lmo0515 | lmo0515 |
| lmo0620 | lmo0620 | lmo0592 | lmo0592 |         |         | lmo0517 | lmo0517 |
| lmo0621 | lmo0621 | lmo0593 | lmo0593 |         |         | lmo0518 | lmo0518 |
| lmo0623 | lmo0623 | lmo0594 | lmo0594 |         |         | lmo0520 | lmo0520 |
| lmo0624 | lmo0624 | lmo0595 | lmo0595 |         |         | lmo0521 | lmo0521 |
| lmo0625 | lmo0625 | lmo0596 | lmo0596 |         |         | lmo0522 | lmo0522 |
| lmo0628 | lmo0628 | lmo0597 | lmo0597 |         |         | lmo0523 | lmo0523 |
| lmo0629 | lmo0629 | lmo0599 | lmo0599 |         |         | lmo0524 | lmo0524 |
| lmo0637 | lmo0637 | lmo0601 | lmo0601 |         |         | lmo0526 | lmo0526 |
| lmo0639 | lmo0639 | lmo0604 | lmo0604 |         |         | lmo0528 | lmo0528 |
| lmo0644 | lmo0644 | lmo0605 | lmo0605 |         |         | lmo0529 | lmo0529 |
| lmo0645 | lmo0645 | lmo0607 | lmo0607 |         |         | lmo0531 | lmo0531 |
| lmo0646 | lmo0646 | lmo0609 | lmo0609 |         |         | lmo0532 | lmo0532 |
| lmo0648 | lmo0648 | lmo0611 | lmo0611 |         |         | lmo0535 | lmo0535 |
| lmo0650 | lmo0650 | lmo0612 | lmo0612 |         |         | lmo0539 | lmo0539 |
| lmo0651 | lmo0651 | lmo0613 | lmo0613 |         |         | lmo0540 | lmo0540 |
| thiD    | lmo0662 | lmo0616 | lmo0616 |         |         | lmo0551 | lmo0551 |
| lmo0663 | lmo0663 | lmo0617 | lmo0617 |         |         | lmo0571 | lmo0571 |
| lmo0674 | lmo0674 | lmo0618 | lmo0618 |         |         | lmo0573 | lmo0573 |
| lmo0721 | lmo0721 | lmo0619 | lmo0619 |         |         | lmo0586 | lmo0586 |
| lmo0727 | lmo0727 | lmo0620 | lmo0620 |         |         | lmo0599 | lmo0599 |
| lmo0764 | lmo0764 | lmo0621 | lmo0621 |         |         | lmo0600 | lmo0600 |
| lmo0774 | lmo0774 | lmo0622 | lmo0622 |         |         | lmo0602 | lmo0602 |
| lmo0777 | lmo0777 | lmo0623 | lmo0623 |         |         | lmo0606 | lmo0606 |
| lmo0781 | lmo0781 | lmo0624 | lmo0624 |         |         | lmo0608 | lmo0608 |
| lmo0782 | lmo0782 | lmo0625 | lmo0625 |         |         | lmo0618 | lmo0618 |
| lmo0783 | lmo0783 | lmo0628 | lmo0628 |         |         | lmo0621 | lmo0621 |
| lmo0784 | lmo0784 | lmo0632 | lmo0632 |         |         | lmo0629 | lmo0629 |
| lmo0788 | lmo0788 | lmo0637 | lmo0637 |         |         | lmo0633 | lmo0633 |
| lmo0794 | lmo0794 | lmo0641 | lmo0641 |         |         | lmo0634 | lmo0634 |
| lmo0796 | lmo0796 | lmo0644 | lmo0644 |         |         | lmo0635 | lmo0635 |
| lmo0799 | lmo0799 | lmo0646 | lmo0646 |         |         | lmo0636 | lmo0636 |
| lmo0813 | lmo0813 | lmo0648 | lmo0648 |         |         | lmo0638 | lmo0638 |
| uhpT    | lmo0838 | lmo0650 | lmo0650 |         |         | lmo0639 | lmo0639 |
| lmo0840 | lmo0840 | lmo0651 | lmo0651 |         |         | lmo0645 | lmo0645 |
| lmo0841 | lmo0841 | lmo0652 | lmo0652 |         |         | lmo0654 | lmo0654 |
| lmo0848 | lmo0848 | lmo0663 | lmo0663 |         |         | lmo0656 | lmo0656 |
| lmo0866 | lmo0866 | lmo0669 | lmo0669 |         |         | lmo0657 | lmo0657 |
| lmo0876 | lmo0876 | lmo0674 | lmo0674 |         |         | lmo0658 | lmo0658 |
| rsbU    | lmo0892 | lmo0695 | lmo0695 |         |         | lmo0659 | lmo0659 |
| rsbX    | lmo0896 | lmo0718 | lmo0718 |         |         | lmo0660 | lmo0660 |
| lmo0907 | lmo0907 | lmo0721 | lmo0721 |         |         | lmo0661 | lmo0661 |
| lmo0909 | lmo0909 | lmo0738 | lmo0738 |         |         | lmo0665 | lmo0665 |
| lmo0915 | lmo0915 | lmo0752 | lmo0752 |         |         | motB    | lmo0686 |
| lmo0927 | lmo0927 | lmo0754 | lmo0754 |         |         | lmo0694 | lmo0694 |
| lmo0937 | lmo0937 | lmo0762 | lmo0762 |         |         | lmo0697 | lmo0697 |
| lmo0939 | lmo0939 | lmo0764 | lmo0764 |         |         | lmo0701 | lmo0701 |
| fri     | lmo0943 | lmo0774 | lmo0774 |         |         | lmo0702 | lmo0702 |
| lmo0944 | lmo0944 | lmo0777 | lmo0777 |         |         | lmo0704 | lmo0704 |
| lmo0964 | lmo0964 | lmo0781 | lmo0781 |         |         | lmo0708 | lmo0708 |
| lmo0969 | lmo0969 | lmo0783 | lmo0783 |         |         | lmo0710 | lmo0710 |
| lmo0970 | lmo0970 | lmo0784 | lmo0784 |         |         | lmo0711 | lmo0711 |
| dltD    | lmo0971 | lmo0786 | lmo0786 |         |         | lmo0713 | lmo0713 |
| dltC    | lmo0972 | lmo0788 | lmo0788 |         |         | lmo0714 | lmo0714 |
| dltB    | lmo0973 | lmo0793 | lmo0793 |         |         | lmo0716 | lmo0716 |
| dltA    | lmo0974 | lmo0794 | lmo0794 |         |         | lmo0719 | lmo0719 |
| lmo0976 | lmo0976 | lmo0795 | lmo0795 |         |         | lmo0720 | lmo0720 |
| lmo0977 | lmo0977 | lmo0796 | lmo0796 |         |         | lmo0722 | lmo0722 |
| lmo0978 | lmo0978 | lmo0797 | lmo0797 |         |         | lmo0736 | lmo0736 |
| lmo0994 | lmo0994 | lmo0798 | lmo0798 |         |         | lmo0745 | lmo0745 |
| clpE    | lmo0997 | lmo0799 | lmo0799 |         |         | lmo0758 | lmo0758 |
| ptsH    | lmo1002 | lmo0803 | lmo0803 |         |         | lmo0763 | lmo0763 |
| lmo1003 | lmo1003 | lmo0804 | lmo0804 |         |         | lmo0770 | lmo0770 |
| lmo1006 | lmo1006 | lmo0813 | lmo0813 |         |         | lmo0782 | lmo0782 |
| lmo1011 | lmo1011 | lmo0837 | lmo0837 |         |         | lmo0787 | lmo0787 |
| lmo1051 | lmo1051 | uhpT    | lmo0838 |         |         | lmo0807 | lmo0807 |
| pdfC    | lmo1054 | lmo0840 | lmo0840 |         |         | lmo0809 | lmo0809 |
| lmo1067 | lmo1067 | lmo0841 | lmo0841 |         |         | lmo0815 | lmo0815 |
| lmo1070 | lmo1070 | lmo0842 | lmo0842 |         |         | lmo0816 | lmo0816 |
| lmo1075 | lmo1075 | lmo0848 | lmo0848 |         |         | lmo0823 | lmo0823 |
| lmo1081 | lmo1081 | ddlA    | lmo0855 |         |         | lmo0824 | lmo0824 |
| lmo1082 | lmo1082 | lmo0876 | lmo0876 |         |         | lmo0826 | lmo0826 |
| lmo1083 | lmo1083 | rsbU    | lmo0892 |         |         | lmo0834 | lmo0834 |
| lmo1084 | lmo1084 | lmo0897 | lmo0897 |         |         | lmo0844 | lmo0844 |
| lmo1086 | lmo1086 | lmo0900 | lmo0900 |         |         | lmo0851 | lmo0851 |
| lmo1087 | lmo1087 | lmo0905 | lmo0905 |         |         | lmo0854 | lmo0854 |
| lmo1093 | lmo1093 | lmo0907 | lmo0907 |         |         | lmo0857 | lmo0857 |
| lmo1094 | lmo1094 | lmo0909 | lmo0909 |         |         | lmo0858 | lmo0858 |
| guaA    | lmo1096 | lmo0910 | lmo0910 |         |         | lmo0860 | lmo0860 |
| lmo1099 | lmo1099 | lmo0911 | lmo0911 |         |         | lmo0862 | lmo0862 |
| lmo1102 | lmo1102 | lmo0915 | lmo0915 |         |         | lmo0865 | lmo0865 |
| lmo1163 | lmo1163 | lmo0916 | lmo0916 |         |         | lmo0868 | lmo0868 |
| lmo1179 | lmo1179 | lmo0927 | lmo0927 |         |         | lmo0869 | lmo0869 |
| lmo1207 | lmo1207 | lmo0933 | lmo0933 |         |         | lmo0879 | lmo0879 |
| pheT    | lmo1222 | lmo0936 | lmo0936 |         |         | lmo0885 | lmo0885 |
| lmo1250 | lmo1250 | lmo0937 | lmo0937 |         |         | lmo0898 | lmo0898 |

|         |         |         |         |         |         |
|---------|---------|---------|---------|---------|---------|
| lmo1272 | lmo1272 | fri     | lmo0943 | lmo0908 | lmo0908 |
| codV    | lmo1277 | lmo0944 | lmo0944 | lmo0914 | lmo0914 |
| lmo1290 | lmo1290 | lmo0947 | lmo0947 | lmo0923 | lmo0923 |
| lmo1291 | lmo1291 | lmo0950 | lmo0950 | lmo0924 | lmo0924 |
| glpD    | lmo1293 | lmo0952 | lmo0952 | lmo0940 | lmo0940 |
| miaA    | lmo1294 | lmo0957 | lmo0957 | lmo0942 | lmo0942 |
| lmo1297 | lmo1297 | lmo0964 | lmo0964 | lmo0960 | lmo0960 |
| glnR    | lmo1298 | lmo0969 | lmo0969 | lmo0966 | lmo0966 |
| glnA    | lmo1299 | lmo0970 | lmo0970 | dltA    | lmo0974 |
| lmo1301 | lmo1301 | dltD    | lmo0971 | lmo0986 | lmo0986 |
| lmo1302 | lmo1302 | dltC    | lmo0972 | lmo0987 | lmo0987 |
| lmo1306 | lmo1306 | lmo0976 | lmo0976 | lmo0988 | lmo0988 |
| smbA    | lmo1313 | lmo0977 | lmo0977 | lmo0989 | lmo0989 |
| frr     | lmo1314 | lmo0978 | lmo0978 | lmo0992 | lmo0992 |
| lmo1315 | lmo1315 | lmo0981 | lmo0981 | lmo0994 | lmo0994 |
| lmo1326 | lmo1326 | clpE    | lmo0997 | lmo1003 | lmo1003 |
| lmo1342 | lmo1342 | lmo1011 | lmo1011 | lmo1006 | lmo1006 |
| lmo1343 | lmo1343 | lmo1044 | lmo1044 | lmo1007 | lmo1007 |
| lmo1352 | lmo1352 | lmo1051 | lmo1051 | lmo1008 | lmo1008 |
| lmo1354 | lmo1354 | lmo1059 | lmo1059 | lmo1013 | lmo1013 |
| cspl    | lmo1364 | lmo1070 | lmo1070 | lmo1018 | lmo1018 |
| tcsA    | lmo1388 | lmo1075 | lmo1075 | lmo1024 | lmo1024 |
| lmo1395 | lmo1395 | lmo1077 | lmo1077 | lmo1025 | lmo1025 |
| mutL    | lmo1404 | lmo1081 | lmo1081 | lmo1031 | lmo1031 |
| pflB    | lmo1406 | lmo1082 | lmo1082 | lmo1041 | lmo1041 |
| pflC    | lmo1407 | lmo1083 | lmo1083 | lmo1066 | lmo1066 |
| lmo1423 | lmo1423 | lmo1084 | lmo1084 | lmo1067 | lmo1067 |
| lmo1424 | lmo1424 | lmo1087 | lmo1087 | lmo1086 | lmo1086 |
| opuCD   | lmo1425 | lmo1093 | lmo1093 | lmo1097 | lmo1097 |
| lmo1431 | lmo1431 | guaA    | lmo1096 | lmo1098 | lmo1098 |
| lmo1432 | lmo1432 | lmo1099 | lmo1099 | lmo1103 | lmo1103 |
| lmo1434 | lmo1434 | lmo1102 | lmo1102 | lmo1108 | lmo1108 |
| lmo1438 | lmo1438 | lmo1116 | lmo1116 | lmo1113 | lmo1113 |
| sod     | lmo1439 | lmo1151 | lmo1151 | lmo1118 | lmo1118 |
| lmo1440 | lmo1440 | lmo1163 | lmo1163 | lmo1127 | lmo1127 |
| lmo1466 | lmo1466 | lmo1179 | lmo1179 | lmo1130 | lmo1130 |
| lmo1468 | lmo1468 | lmo1180 | lmo1180 | lmo1131 | lmo1131 |
| dnaK    | lmo1473 | lmo1189 | lmo1189 | lmo1135 | lmo1135 |
| grpE    | lmo1474 | lmo1207 | lmo1207 | lmo1137 | lmo1137 |
| comEB   | lmo1483 | pheT    | lmo1222 | lmo1156 | lmo1156 |
| comEA   | lmo1484 | lmo1250 | lmo1250 | glpF    | lmo1167 |
| lmo1492 | lmo1492 | lmo1272 | lmo1272 | cbiE    | lmo1195 |
| udk     | lmo1497 | lmo1290 | lmo1290 | cbiH    | lmo1199 |
| lmo1499 | lmo1499 | lmo1291 | lmo1291 | cbiK    | lmo1202 |
| lmo1502 | lmo1502 | lmo1297 | lmo1297 | lmo1211 | lmo1211 |
| lmo1503 | lmo1503 | glnR    | lmo1298 | lmo1216 | lmo1216 |
| lmo1512 | lmo1512 | lmo1302 | lmo1302 | lmo1219 | lmo1219 |
| lmo1518 | lmo1518 | thrB    | lmo1305 | lmo1223 | lmo1223 |
| lmo1521 | lmo1521 | lmo1306 | lmo1306 | lmo1224 | lmo1224 |
| lmo1536 | lmo1536 | frr     | lmo1314 | lmo1231 | lmo1231 |
| lmo1537 | lmo1537 | lmo1315 | lmo1315 | lmo1253 | lmo1253 |
| lmo1538 | lmo1538 | lmo1317 | lmo1317 | lmo1256 | lmo1256 |
| rpmA    | lmo1540 | lmo1318 | lmo1318 | lmo1257 | lmo1257 |
| lmo1541 | lmo1541 | lmo1321 | lmo1321 | lmo1264 | lmo1264 |
| rplU    | lmo1542 | nusA    | lmo1322 | tig     | lmo1267 |
| mreC    | lmo1547 | infB    | lmo1325 | lmo1271 | lmo1271 |
| mreB    | lmo1548 | lmo1326 | lmo1326 | rnhB    | lmo1273 |
| dnaB    | lmo1561 | ribC    | lmo1329 | codV    | lmo1277 |
| lmo1562 | lmo1562 | lmo1342 | lmo1342 | lmo1292 | lmo1292 |
| citC    | lmo1566 | lmo1343 | lmo1343 | glnA    | lmo1299 |
| lmo1578 | lmo1578 | lmo1350 | lmo1350 | lmo1303 | lmo1303 |
| lmo1592 | lmo1592 | lmo1352 | lmo1352 | lmo1310 | lmo1310 |
| rpsD    | lmo1596 | lmo1354 | lmo1354 | lmo1323 | lmo1323 |
| aroA    | lmo1600 | cspl    | lmo1364 | rbfA    | lmo1327 |
| lmo1601 | lmo1601 | tkk     | lmo1365 | truB    | lmo1328 |
| lmo1602 | lmo1602 | lmo1405 | lmo1405 | pnpA    | lmo1331 |
| murC    | lmo1605 | pflB    | lmo1406 | lmo1332 | lmo1332 |
| lmo1606 | lmo1606 | pflC    | lmo1407 | lmo1345 | lmo1345 |
| lmo1615 | lmo1615 | lmo1414 | lmo1414 | lmo1356 | lmo1356 |
| lmo1616 | lmo1616 | lmo1415 | lmo1415 | lmo1369 | lmo1369 |
| lmo1634 | lmo1634 | lmo1423 | lmo1423 | lmo1371 | lmo1371 |
| lmo1639 | lmo1639 | lmo1424 | lmo1424 | lmo1372 | lmo1372 |
| citB    | lmo1641 | opuCD   | lmo1425 | lmo1373 | lmo1373 |
| lmo1643 | lmo1643 | opuCA   | lmo1428 | lmo1384 | lmo1384 |
| lmo1649 | lmo1649 | lmo1431 | lmo1431 | recA    | lmo1398 |
| lmo1650 | lmo1650 | lmo1432 | lmo1432 | lmo1401 | lmo1401 |
| tsf     | lmo1657 | lmo1433 | lmo1433 | lmo1410 | lmo1410 |
| rpsB    | lmo1658 | lmo1434 | lmo1434 | lmo1435 | lmo1435 |
| leuS    | lmo1660 | lmo1436 | lmo1436 | lmo1453 | lmo1453 |
| ansB    | lmo1663 | lmo1438 | lmo1438 | glyQ    | lmo1459 |
| lmo1665 | lmo1665 | smc     | lmo1439 | lmo1462 | lmo1462 |
| menD    | lmo1675 | zurM    | lmo1446 | lmo1463 | lmo1463 |
| lmo1677 | lmo1677 | rpoD    | lmo1454 | hrcA    | lmo1475 |
| lmo1687 | lmo1687 | lmo1466 | lmo1466 | rpsT    | lmo1480 |
| lmo1688 | lmo1688 | lmo1468 | lmo1468 | lmo1481 | lmo1481 |
| lmo1690 | lmo1690 | rpsU    | lmo1469 | comEA   | lmo1484 |
| lmo1693 | lmo1693 | lmo1470 | lmo1470 | lmo1506 | lmo1506 |
| lmo1695 | lmo1695 | grpE    | lmo1474 | apt     | lmo1524 |
| lmo1701 | lmo1701 | lepA    | lmo1479 | lmo1526 | lmo1526 |
| lmo1703 | lmo1703 | comEA   | lmo1484 | lmo1528 | lmo1528 |
| lmo1705 | lmo1705 | lmo1487 | lmo1487 | lmo1531 | lmo1531 |
| lmo1711 | lmo1711 | lmo1490 | lmo1490 | lmo1534 | lmo1534 |
| lmo1713 | lmo1713 | lmo1492 | lmo1492 | lmo1537 | lmo1537 |
| lmo1716 | lmo1716 | lmo1494 | lmo1494 | lmo1549 | lmo1549 |
| lmo1721 | lmo1721 | udk     | lmo1497 | thrS    | lmo1559 |
| lmo1722 | lmo1722 | lmo1499 | lmo1499 | lmo1562 | lmo1562 |
| lmo1729 | lmo1729 | lmo1500 | lmo1500 | lmo1577 | lmo1577 |
| lmo1741 | lmo1741 | lmo1501 | lmo1501 | lmo1582 | lmo1582 |
| adeC    | lmo1742 | lmo1502 | lmo1502 | argD    | lmo1588 |
| lmo1745 | lmo1745 | lmo1503 | lmo1503 | lmo1601 | lmo1601 |
| lmo1751 | lmo1751 | lmo1505 | lmo1505 | lmo1606 | lmo1606 |

|         |         |         |         |         |         |
|---------|---------|---------|---------|---------|---------|
| lmo1752 | lmo1752 | lmo1507 | lmo1507 | pheT    | lmo1607 |
| lmo1753 | lmo1753 | lmo1508 | lmo1508 | lmo1610 | lmo1610 |
| lmo1760 | lmo1760 | lmo1512 | lmo1512 | lmo1614 | lmo1614 |
| lmo1761 | lmo1761 | lmo1513 | lmo1513 | daaA    | lmo1619 |
| purD    | lmo1764 | lmo1518 | lmo1518 | lmo1621 | lmo1621 |
| lmo1780 | lmo1780 | lmo1530 | lmo1530 | trpC    | lmo1630 |
| lmo1782 | lmo1782 | ruvB    | lmo1532 | lmo1635 | lmo1635 |
| rpIT    | lmo1783 | lmo1536 | lmo1536 | lmo1636 | lmo1636 |
| infC    | lmo1785 | lmo1538 | lmo1538 | lmo1638 | lmo1638 |
| inlC    | lmo1786 | rpmA    | lmo1540 | lmo1640 | lmo1640 |
| lmo1791 | lmo1791 | lmo1541 | lmo1541 | lmo1643 | lmo1643 |
| trmD    | lmo1792 | rplU    | lmo1542 | lmo1651 | lmo1651 |
| rpsP    | lmo1797 | minC    | lmo1545 | lmo1662 | lmo1662 |
| lmo1847 | lmo1847 | mreC    | lmo1547 | lmo1677 | lmo1677 |
| lmo1848 | lmo1848 | dnaB    | lmo1561 | lmo1679 | lmo1679 |
| lmo1849 | lmo1849 | citC    | lmo1566 | lmo1682 | lmo1682 |
| lmo1855 | lmo1855 | lmo1569 | lmo1569 | lmo1691 | lmo1691 |
| lmo1860 | lmo1860 | lmo1578 | lmo1578 | lmo1694 | lmo1694 |
| hup     | lmo1934 | argJ    | lmo1590 | lmo1696 | lmo1696 |
| lmo1938 | lmo1938 | lmo1592 | lmo1592 | lmo1703 | lmo1703 |
| resD    | lmo1948 | rpsD    | lmo1596 | lmo1719 | lmo1719 |
| lmo1955 | lmo1955 | aroA    | lmo1600 | lmo1771 | lmo1771 |
| fur     | lmo1956 | lmo1602 | lmo1602 | purB    | lmo1773 |
| lmo1962 | lmo1962 | lmo1603 | lmo1603 | purE    | lmo1775 |
| lmo1966 | lmo1966 | lmo1606 | lmo1606 | lmo1820 | lmo1820 |
| lmo1967 | lmo1967 | lmo1609 | lmo1609 | lmo1822 | lmo1822 |
| ilvN    | lmo1985 | lmo1612 | lmo1612 | lmo1854 | lmo1854 |
| alsS    | lmo2006 | lmo1615 | lmo1615 | lmo1859 | lmo1859 |
| cspB    | lmo2016 | lmo1616 | lmo1616 | lmo1868 | lmo1868 |
| divIVA  | lmo2020 | lmo1634 | lmo1634 | lmo1882 | lmo1882 |
| nadC    | lmo2024 | lmo1639 | lmo1639 | lmo1890 | lmo1890 |
| nadA    | lmo2025 | citB    | lmo1641 | recU    | lmo1891 |
| lmo2028 | lmo2028 | lmo1642 | lmo1642 | cca     | lmo1905 |
| lmo2029 | lmo2029 | lmo1645 | lmo1645 | lmo1908 | lmo1908 |
| lmo2030 | lmo2030 | lmo1646 | lmo1646 | lmo1909 | lmo1909 |
| pbpB    | lmo2039 | lmo1649 | lmo1649 | lmo1912 | lmo1912 |
| lmo2048 | lmo2048 | tsf     | lmo1657 | lmo1915 | lmo1915 |
| ctaA    | lmo2058 | rpsB    | lmo1658 | pflA    | lmo1917 |
| groEl   | lmo2068 | lmo1661 | lmo1661 | lmo1919 | lmo1919 |
| lmo2072 | lmo2072 | ansB    | lmo1663 | lmo1920 | lmo1920 |
| lmo2076 | lmo2076 | metK    | lmo1664 | lmo1922 | lmo1922 |
| lmo2077 | lmo2077 | lmo1665 | lmo1665 | hisC    | lmo1925 |
| lmo2078 | lmo2078 | lmo1666 | lmo1666 | lmo1933 | lmo1933 |
| lmo2083 | lmo2083 | lmo1671 | lmo1671 | lmo1951 | lmo1951 |
| lmo2101 | lmo2101 | lmo1683 | lmo1683 | fhuB    | lmo1958 |
| lmo2102 | lmo2102 | lmo1687 | lmo1687 | lmo1963 | lmo1963 |
| pta     | lmo2103 | lmo1690 | lmo1690 | lmo1969 | lmo1969 |
| lmo2114 | lmo2114 | lmo1693 | lmo1693 | lmo1974 | lmo1974 |
| lmo2115 | lmo2115 | lmo1695 | lmo1695 | lmo1975 | lmo1975 |
| lmo2119 | lmo2119 | lmo1697 | lmo1697 | lmo1982 | lmo1982 |
| lmo2120 | lmo2120 | lmo1701 | lmo1701 | ilvD    | lmo1983 |
| lmo2133 | lmo2133 | lmo1705 | lmo1705 | leuA    | lmo1987 |
| lmo2148 | lmo2148 | lmo1707 | lmo1707 | leuC    | lmo1989 |
| lmo2152 | lmo2152 | lmo1708 | lmo1708 | lmo1996 | lmo1996 |
| lmo2153 | lmo2153 | lmo1710 | lmo1710 | lmo2002 | lmo2002 |
| lmo2154 | lmo2154 | lmo1711 | lmo1711 | lmo2003 | lmo2003 |
| lmo2155 | lmo2155 | lmo1713 | lmo1713 | lmo2007 | lmo2007 |
| sepA    | lmo2157 | lmo1716 | lmo1716 | lmo2010 | lmo2010 |
| lmo2158 | lmo2158 | lmo1721 | lmo1721 | lmo2012 | lmo2012 |
| lmo2177 | lmo2177 | lmo1722 | lmo1722 | lmo2017 | lmo2017 |
| lmo2181 | lmo2181 | lmo1727 | lmo1727 | lmo2021 | lmo2021 |
| lmo2182 | lmo2182 | lmo1729 | lmo1729 | lmo2027 | lmo2027 |
| lmo2184 | lmo2184 | lmo1730 | lmo1730 | lmo2049 | lmo2049 |
| lmo2185 | lmo2185 | lmo1732 | lmo1732 | lmo2050 | lmo2050 |
| lmo2186 | lmo2186 | lmo1736 | lmo1736 | lmo2052 | lmo2052 |
| lmo2188 | lmo2188 | lmo1737 | lmo1737 | lmo2056 | lmo2056 |
| mecA    | lmo2190 | lmo1740 | lmo1740 | lmo2061 | lmo2061 |
| lmo2191 | lmo2191 | lmo1741 | lmo1741 | lmo2062 | lmo2062 |
| lmo2192 | lmo2192 | adeC    | lmo1742 | lmo2089 | lmo2089 |
| lmo2193 | lmo2193 | lmo1743 | lmo1743 | argH    | lmo2091 |
| lmo2194 | lmo2194 | lmo1745 | lmo1745 | lmo2097 | lmo2097 |
| lmo2195 | lmo2195 | lmo1747 | lmo1747 | lmo2098 | lmo2098 |
| lmo2196 | lmo2196 | lmo1750 | lmo1750 | lmo2100 | lmo2100 |
| trpS    | lmo2198 | lmo1751 | lmo1751 | lmo2105 | lmo2105 |
| lmo2199 | lmo2199 | lmo1752 | lmo1752 | lmo2116 | lmo2116 |
| lmo2201 | lmo2201 | lmo1753 | lmo1753 | lmo2118 | lmo2118 |
| lmo2202 | lmo2202 | gatA    | lmo1755 | lmo2121 | lmo2121 |
| lmo2203 | lmo2203 | lmo1760 | lmo1760 | lmo2122 | lmo2122 |
| lmo2204 | lmo2204 | lmo1761 | lmo1761 | lmo2140 | lmo2140 |
| lmo2205 | lmo2205 | purD    | lmo1764 | lmo2142 | lmo2142 |
| clpB    | lmo2206 | purH    | lmo1765 | lmo2144 | lmo2144 |
| lmo2207 | lmo2207 | purN    | lmo1766 | lmo2159 | lmo2159 |
| lmo2208 | lmo2208 | purM    | lmo1767 | lmo2184 | lmo2184 |
| lmo2209 | lmo2209 | purF    | lmo1768 | lmo2187 | lmo2187 |
| lmo2210 | lmo2210 | purI    | lmo1770 | lmo2188 | lmo2188 |
| hemH    | lmo2211 | purK    | lmo1774 | lmo2189 | lmo2189 |
| lmo2215 | lmo2215 | lmo1776 | lmo1776 | lmo2246 | lmo2246 |
| lmo2219 | lmo2219 | lmo1780 | lmo1780 | lmo2248 | lmo2248 |
| lmo2223 | lmo2223 | lmo1782 | lmo1782 | lmo2249 | lmo2249 |
| citG    | lmo2225 | rpIT    | lmo1783 | lmo2252 | lmo2252 |
| lmo2234 | lmo2234 | infC    | lmo1785 | lmo2253 | lmo2253 |
| lmo2235 | lmo2235 | inlC    | lmo1786 | lmo2259 | lmo2259 |
| lmo2251 | lmo2251 | lmo1791 | lmo1791 | lmo2261 | lmo2261 |
| lmo2253 | lmo2253 | trmD    | lmo1792 | lmo2282 | lmo2282 |
| lmo2254 | lmo2254 | lmo1796 | lmo1796 | lmo2287 | lmo2287 |
| lmo2263 | lmo2263 | rpsP    | lmo1797 | lmo2291 | lmo2291 |
| lmo2267 | lmo2267 | lmo1802 | lmo1802 | lmo2295 | lmo2295 |
| lmo2269 | lmo2269 | lmo1803 | lmo1803 | lmo2296 | lmo2296 |
| lmo2277 | lmo2277 | smbA    | lmo1804 | lmo2303 | lmo2303 |
| lmo2360 | lmo2360 | rncS    | lmo1805 | lmo2306 | lmo2306 |
| pgi     | lmo2367 | fabG    | lmo1807 | lmo2309 | lmo2309 |

|         |         |         |         |         |         |
|---------|---------|---------|---------|---------|---------|
| lmo2376 | lmo2376 | lmo1811 | lmo1811 | lmo2311 | lmo2311 |
| lmo2384 | lmo2384 | lmo1813 | lmo1813 | lmo2312 | lmo2312 |
| lmo2386 | lmo2386 | lmo1814 | lmo1814 | lmo2318 | lmo2318 |
| lmo2390 | lmo2390 | lmo1817 | lmo1817 | lmo2324 | lmo2324 |
| lmo2391 | lmo2391 | fmt     | lmo1823 | lmo2326 | lmo2326 |
| ltrC    | lmo2398 | lmo1826 | lmo1826 | lmo2334 | lmo2334 |
| lmo2399 | lmo2399 | lmo1827 | lmo1827 | fruA    | lmo2335 |
| lmo2411 | lmo2411 | lmo1843 | lmo1843 | lmo2377 | lmo2377 |
| lmo2412 | lmo2412 | lmo1845 | lmo1845 | lmo2378 | lmo2378 |
| lmo2413 | lmo2413 | lmo1847 | lmo1847 | lmo2381 | lmo2381 |
| lmo2414 | lmo2414 | lmo1848 | lmo1848 | lmo2392 | lmo2392 |
| lmo2415 | lmo2415 | lmo1849 | lmo1849 | lmo2394 | lmo2394 |
| lmo2439 | lmo2439 | lmo1850 | lmo1850 | lmo2396 | lmo2396 |
| pgm     | lmo2456 | lmo1855 | lmo1855 | lmo2401 | lmo2401 |
| gap     | lmo2459 | deoD    | lmo1856 | lmo2402 | lmo2402 |
| lmo2471 | lmo2471 | lmo1860 | lmo1860 | lmo2405 | lmo2405 |
| trxB    | lmo2478 | lmo1862 | lmo1862 | lmo2427 | lmo2427 |
| uvrB    | lmo2489 | lmo1874 | lmo1874 | lmo2465 | lmo2465 |
| phoR    | lmo2500 | lmo1881 | lmo1881 | lmo2480 | lmo2480 |
| lmo2503 | lmo2503 | lmo1887 | lmo1887 | lmo2483 | lmo2483 |
| spl     | lmo2505 | pbbA    | lmo1892 | lmo2485 | lmo2485 |
| ftsX    | lmo2506 | panD    | lmo1900 | lmo2486 | lmo2486 |
| lmo2515 | lmo2515 | aroE    | lmo1923 | uvrA    | lmo2488 |
| lmo2518 | lmo2518 | aroF    | lmo1928 | lmo2493 | lmo2493 |
| lmo2522 | lmo2522 | ndk     | lmo1929 | lmo2496 | lmo2496 |
| murA    | lmo2526 | menH    | lmo1931 | lmo2497 | lmo2497 |
| atpD    | lmo2529 | lmo1932 | lmo1932 | lmo2502 | lmo2502 |
| fbmA    | lmo2556 | lmo1937 | lmo1937 | lmo2503 | lmo2503 |
| lmo2560 | lmo2560 | lmo1938 | lmo1938 | atpA    | lmo2531 |
| rpsI    | lmo2596 | resD    | lmo1948 | lmo2540 | lmo2540 |
| rplM    | lmo2597 | drm     | lmo1954 | lmo2555 | lmo2555 |
| rpsM    | lmo2608 | lmo1955 | lmo1955 | fbmA    | lmo2556 |
| infA    | lmo2610 | fur     | lmo1956 | lmo2579 | lmo2579 |
| rplO    | lmo2613 | lmo1962 | lmo1962 | lmo2583 | lmo2583 |
| rplX    | lmo2621 | lmo1966 | lmo1966 | lmo2592 | lmo2592 |
| rplV    | lmo2627 | lmo1967 | lmo1967 | rplF    | lmo2617 |
| rplB    | lmo2629 | lmo1970 | lmo1970 | rpsC    | lmo2626 |
| rplC    | lmo2632 | ilvN    | lmo1985 | rpsG    | lmo2655 |
| rpsJ    | lmo2633 | ilvC    | lmo1986 | rpsI    | lmo2656 |
| fus     | lmo2654 | ilvA    | lmo1991 | lmo2657 | lmo2657 |
| rpsG    | lmo2655 | lmo1992 | lmo1992 | lmo2661 | lmo2661 |
| lmo2691 | lmo2691 | lmo1997 | lmo1997 | lmo2662 | lmo2662 |
| lmo2692 | lmo2692 | cspB    | lmo2016 | lmo2676 | lmo2676 |
| lmo2696 | lmo2696 | lmo2018 | lmo2018 | lmo2693 | lmo2693 |
| lmo2697 | lmo2697 | nadC    | lmo2024 | lmo2695 | lmo2695 |
| recR    | lmo2702 | lmo2028 | lmo2028 | lmo2696 | lmo2696 |
| lmo2703 | lmo2703 | lmo2029 | lmo2029 | lmo2697 | lmo2697 |
| dnaX    | lmo2704 | lmo2030 | lmo2030 | lmo2699 | lmo2699 |
| lmo2713 | lmo2713 | ftsA    | lmo2033 | lmo2724 | lmo2724 |
| lmo2714 | lmo2714 | murG    | lmo2035 | lmo2725 | lmo2725 |
| cydD    | lmo2715 | murD    | lmo2036 | lmo2751 | lmo2751 |
| cydA    | lmo2718 | mraY    | lmo2037 | lmo2754 | lmo2754 |
| lmo2729 | lmo2729 | murE    | lmo2038 | topB    | lmo2756 |
| lmo2730 | lmo2730 | pbbB    | lmo2039 | lmo2757 | lmo2757 |
| lmo2731 | lmo2731 | lmo2042 | lmo2042 | lmo2772 | lmo2772 |
| lmo2770 | lmo2770 | lmo2048 | lmo2048 | lmo2779 | lmo2779 |
| lmo2779 | lmo2779 | ctaB    | lmo2057 | lmo2780 | lmo2780 |
| kat     | lmo2785 | lmo2067 | lmo2067 | lmo2781 | lmo2781 |
| lmo2794 | lmo2794 | groEI   | lmo2068 | lmo2795 | lmo2795 |
|         |         | lmo2072 | lmo2072 | lmo2805 | lmo2805 |
|         |         | lmo2076 | lmo2076 | lmo2807 | lmo2807 |
|         |         | lmo2077 | lmo2077 | lmo2812 | lmo2812 |
|         |         | lmo2078 | lmo2078 | lmo2816 | lmo2816 |
|         |         | lmo2082 | lmo2082 | lmo2817 | lmo2817 |
|         |         | lmo2083 | lmo2083 | lmo2828 | lmo2828 |
|         |         | lmo2094 | lmo2094 | lmo2833 | lmo2833 |
|         |         | lmo2099 | lmo2099 |         |         |
|         |         | lmo2101 | lmo2101 |         |         |
|         |         | lmo2102 | lmo2102 |         |         |
|         |         | lmo2112 | lmo2112 |         |         |
|         |         | lmo2113 | lmo2113 |         |         |
|         |         | lmo2114 | lmo2114 |         |         |
|         |         | lmo2119 | lmo2119 |         |         |
|         |         | lmo2120 | lmo2120 |         |         |
|         |         | lmo2133 | lmo2133 |         |         |
|         |         | lmo2135 | lmo2135 |         |         |
|         |         | lmo2145 | lmo2145 |         |         |
|         |         | lmo2149 | lmo2149 |         |         |
|         |         | lmo2150 | lmo2150 |         |         |
|         |         | lmo2151 | lmo2151 |         |         |
|         |         | lmo2153 | lmo2153 |         |         |
|         |         | lmo2154 | lmo2154 |         |         |
|         |         | lmo2155 | lmo2155 |         |         |
|         |         | sepA    | lmo2157 |         |         |
|         |         | lmo2158 | lmo2158 |         |         |
|         |         | lmo2177 | lmo2177 |         |         |
|         |         | lmo2178 | lmo2178 |         |         |
|         |         | lmo2182 | lmo2182 |         |         |
|         |         | lmo2185 | lmo2185 |         |         |
|         |         | lmo2186 | lmo2186 |         |         |
|         |         | mecA    | lmo2190 |         |         |
|         |         | lmo2191 | lmo2191 |         |         |
|         |         | lmo2192 | lmo2192 |         |         |
|         |         | lmo2193 | lmo2193 |         |         |
|         |         | lmo2195 | lmo2195 |         |         |
|         |         | lmo2196 | lmo2196 |         |         |
|         |         | trpS    | lmo2198 |         |         |
|         |         | lmo2199 | lmo2199 |         |         |
|         |         | lmo2200 | lmo2200 |         |         |
|         |         | lmo2201 | lmo2201 |         |         |
|         |         | lmo2202 | lmo2202 |         |         |

|         |         |
|---------|---------|
| lmo2203 | lmo2203 |
| lmo2204 | lmo2204 |
| lmo2205 | lmo2205 |
| clpB    | lmo2206 |
| lmo2207 | lmo2207 |
| lmo2208 | lmo2208 |
| lmo2209 | lmo2209 |
| lmo2210 | lmo2210 |
| hemH    | lmo2211 |
| lmo2215 | lmo2215 |
| lmo2219 | lmo2219 |
| lmo2220 | lmo2220 |
| lmo2223 | lmo2223 |
| citG    | lmo2225 |
| lmo2230 | lmo2230 |
| lmo2233 | lmo2233 |
| lmo2234 | lmo2234 |
| lmo2235 | lmo2235 |
| arpJ    | lmo2250 |
| lmo2254 | lmo2254 |
| lmo2263 | lmo2263 |
| lmo2267 | lmo2267 |
| lmo2269 | lmo2269 |
| lmo2277 | lmo2277 |
| lmo2284 | lmo2284 |
| lmo2328 | lmo2328 |
| lmo2330 | lmo2330 |
| lmo2339 | lmo2339 |
| lmo2360 | lmo2360 |
| lmo2376 | lmo2376 |
| lmo2384 | lmo2384 |
| lmo2386 | lmo2386 |
| lmo2387 | lmo2387 |
| lmo2389 | lmo2389 |
| lmo2391 | lmo2391 |
| ltrC    | lmo2398 |
| lmo2399 | lmo2399 |
| lmo2411 | lmo2411 |
| lmo2412 | lmo2412 |
| lmo2413 | lmo2413 |
| lmo2414 | lmo2414 |
| lmo2415 | lmo2415 |
| lmo2417 | lmo2417 |
| lmo2418 | lmo2418 |
| lmo2422 | lmo2422 |
| lmo2431 | lmo2431 |
| lmo2434 | lmo2434 |
| lmo2438 | lmo2438 |
| lmo2440 | lmo2440 |
| lmo2442 | lmo2442 |
| lmo2444 | lmo2444 |
| lmo2446 | lmo2446 |
| lmo2447 | lmo2447 |
| lmo2448 | lmo2448 |
| lmo2450 | lmo2450 |
| lmo2451 | lmo2451 |
| lmo2453 | lmo2453 |
| lmo2454 | lmo2454 |
| eno     | lmo2455 |
| pgm     | lmo2456 |
| tpi     | lmo2457 |
| pgk     | lmo2458 |
| gap     | lmo2459 |
| lmo2460 | lmo2460 |
| clpP    | lmo2468 |
| lmo2469 | lmo2469 |
| lmo2471 | lmo2471 |
| lmo2472 | lmo2472 |
| lmo2473 | lmo2473 |
| lmo2474 | lmo2474 |
| trxB    | lmo2478 |
| lmo2481 | lmo2481 |
| uvrB    | lmo2489 |
| lmo2492 | lmo2492 |
| phoR    | lmo2500 |
| sod     | lmo2505 |
| ftsX    | lmo2506 |
| lmo2511 | lmo2511 |
| lmo2518 | lmo2518 |
| lmo2522 | lmo2522 |
| lmo2524 | lmo2524 |
| mbI     | lmo2525 |
| murA    | lmo2526 |
| atpD    | lmo2529 |
| atpB    | lmo2535 |
| prf1    | lmo2543 |
| sul     | lmo2545 |
| murZ    | lmo2552 |
| lmo2562 | lmo2562 |
| lmo2569 | lmo2569 |
| lmo2572 | lmo2572 |
| lmo2573 | lmo2573 |
| lmo2591 | lmo2591 |
| rpsI    | lmo2596 |
| rplM    | lmo2597 |
| lmo2599 | lmo2599 |
| lmo2601 | lmo2601 |
| lmo2603 | lmo2603 |
| rplQ    | lmo2605 |
| rpoA    | lmo2606 |
| rpsM    | lmo2608 |

|         |         |
|---------|---------|
| adk     | lmo2611 |
| secY    | lmo2612 |
| rplO    | lmo2613 |
| rpsE    | lmo2615 |
| rplR    | lmo2616 |
| rpsH    | lmo2618 |
| rplX    | lmo2621 |
| rplN    | lmo2622 |
| rplV    | lmo2627 |
| rpsS    | lmo2628 |
| rplB    | lmo2629 |
| rpsJ    | lmo2633 |
| lmo2635 | lmo2635 |
| lmo2636 | lmo2636 |
| lmo2652 | lmo2652 |
| tufA    | lmo2653 |
| fus     | lmo2654 |
| rpsG    | lmo2655 |
| lmo2679 | lmo2679 |
| kdpC    | lmo2680 |
| lmo2683 | lmo2683 |
| lmo2684 | lmo2684 |
| lmo2691 | lmo2691 |
| lmo2692 | lmo2692 |
| recR    | lmo2702 |
| lmo2703 | lmo2703 |
| dnaX    | lmo2704 |
| lmo2708 | lmo2708 |
| lmo2711 | lmo2711 |
| lmo2713 | lmo2713 |
| lmo2714 | lmo2714 |
| cydD    | lmo2715 |
| cydC    | lmo2716 |
| cydB    | lmo2717 |
| cydA    | lmo2718 |
| lmo2720 | lmo2720 |
| lmo2729 | lmo2729 |
| lmo2731 | lmo2731 |
| lmo2736 | lmo2736 |
| lmo2741 | lmo2741 |
| lmo2745 | lmo2745 |
| lmo2770 | lmo2770 |
| bvrC    | lmo2786 |
| lmo2794 | lmo2794 |
| gidB    | lmo2802 |
| lmo2821 | lmo2821 |
| lmo2822 | lmo2822 |
| lmo2829 | lmo2829 |
| lmo2837 | lmo2837 |
| lmo2842 | lmo2842 |
| lmo2845 | lmo2845 |
| lmo2851 | lmo2851 |
