# Supplementary material for: In Vivo Transcriptional Profiling of Listeria monocytogenes and Mutagenesis Identify New Virulence Factors Involved in Infection
Source: PubMed Central journal article supplement (PMC2679221; doi:10.1371/journal.ppat.1000449), 2009-05-29
Supplement: ppat.1000449.s005.pdf [file ppat.1000449.s005.pdf]

**Table S3. *L. monocytogenes*** EGDe genes differentially regulated in the host as compared to exponential growth in BHI at 37°C

| Gene designation | Gene    | Annotation                                                                            | Homolog in <i>L. innocua</i> | Fold change 24h | Fold change 48h | Fold change 72h |
|------------------|---------|---------------------------------------------------------------------------------------|------------------------------|-----------------|-----------------|-----------------|
| dnaA             | lmo0001 | chromosomal replication initiation protein DnaA                                       | lin0001, dnaA                |                 | 2,38            |                 |
| recF             | lmo0005 | recombination protein F RecF                                                          | lin0005, recF                |                 | 2,82            |                 |
| gyrA             | lmo0007 | DNA gyrase subunit A                                                                  | lin0007, gyrA                |                 | 3,11            |                 |
| lmo0010          | lmo0010 | similar to mevalonate kinase                                                          | lin0010                      |                 | 3,48            |                 |
| mvaD             | lmo0011 | similar to mevalonate diphosphate decarboxylase                                       | lin0011                      |                 | 2,35            |                 |
| lmo0012          | lmo0012 | similar to mevalonate kinases                                                         | lin0012                      |                 | 3,40            |                 |
| qoxA             | lmo0013 | AA3-600 quinol oxidase subunit II                                                     | lin0013, qoxA                |                 | 2,94            |                 |
| qoxB             | lmo0014 | AA3-600 quinol oxidase subunit I                                                      | lin0014, qoxB                |                 | 2,42            |                 |
| qoxD             | lmo0016 | highly similar to quinol oxidase aa3-600 chain IV                                     | lin0016                      |                 | 2,99            |                 |
| lmo0023          | lmo0023 | similar to PTS system, fructose-specific IIC component                                | lin0022                      |                 |                 | -2,05           |
| lmo0024          | lmo0024 | similar to PTS system, mannose-specific IID component                                 | lin0023                      |                 |                 | -2,88           |
| lmo0032          | lmo0032 | similar to xylose repressor                                                           | lin0031                      |                 |                 | -2,30           |
| lmo0033          | lmo0033 | similar to endoglucanase                                                              | lin0032                      |                 |                 | -2,10           |
| ssb              | lmo0045 | highly similar to single-strand binding protein (SSB)                                 | lin0038                      |                 | 7,98            | 3,41            |
| rpsR             | lmo0046 | ribosomal protein S18                                                                 | lin0039, rpsR                |                 | 4,21            |                 |
| rplI             | lmo0053 | 50S ribosomal protein L9                                                              | lin0046, rplI                |                 | 4,04            | 2,69            |
| dnaC             | lmo0054 | replicative DNA helicase DnaC                                                         | lin0047                      |                 |                 | 2,14            |
| purA             | lmo0055 | adenylosuccinate synthetase                                                           | lin0048                      |                 | 11,87           |                 |
| lmo0098          | lmo0098 | similar to PTS system mannose-specific, factor IID                                    | lin0145                      |                 | 3,00            |                 |
| lmo0150          | lmo0150 | unknown protein                                                                       |                              |                 | 16,53           |                 |
| lmo0153          | lmo0153 | similar to a probable high-affinity zinc ABC transporter (Zn(II)-binding lipoprotein) | lin0191                      |                 | 5,32            |                 |
| lmo0158          | lmo0158 | unknown protein                                                                       | lin0196                      | 2,45            | 4,48            |                 |
| lmo0161          | lmo0161 | unknown protein                                                                       | lin0204                      |                 | 3,72            |                 |
| holB             | lmo0162 | DNA polymerase III subunit delta                                                      | lin0205                      | 3,36            | 5,99            |                 |
| lmo0165          | lmo0165 | unknown protein                                                                       | lin0208                      |                 | 3,82            |                 |
| lmo0169          | lmo0169 | similar to a glucose uptake protein                                                   | lin0212                      |                 | 3,11            |                 |
| lmo0189          | lmo0189 | highly similar to B subtilis Veg protein                                              | lin0228                      |                 | 10,91           |                 |
| ispE             | lmo0190 | 4-diphosphocytidyl-2-C-methyl-D-erythritol kinase                                     | lin0229                      |                 | 2,15            |                 |
| spoVG-1          | lmo0196 | similar to B subtilis SpoVG protein                                                   | lin0235                      |                 | 6,61            | 3,82            |
| prfA             | lmo0200 | listeriolysin positive regulatory protein                                             |                              |                 | 8,09            | 4,00            |
| plcA             | lmo0201 | phosphatidylinositol-specific phospholipase c                                         |                              | 7,20            | 48,31           | 6,70            |
| hly              | lmo0202 | listeriolysin O precursor                                                             |                              | 35,56           | 118,39          | 15,14           |
| mpl              | lmo0203 | Zinc metalloproteinase precursor                                                      | lin0694                      |                 | 3,36            | 4,68            |
| actA             | lmo0204 | actin-assembly inducing protein precursor                                             |                              | 6,02            | 15,58           | 4,49            |
| plcB             | lmo0205 | phospholipase C                                                                       |                              | 12,37           | 106,64          | 31,78           |
| lmo0206          | lmo0206 | unknown protein                                                                       |                              |                 |                 | 3,11            |
| lmo0207          | lmo0207 | hypothetical lipoprotein                                                              | lin0239                      |                 | 5,31            | 3,27            |
| lmo0208          | lmo0208 | unknown protein                                                                       | lin0240                      |                 | 3,95            |                 |
| ctc              | lmo0211 | general stress protein Ctc                                                            | lin0243                      |                 | 5,81            |                 |
| lmo0216          | lmo0216 | highly similar to B subtilis YabO protein                                             | lin0248                      |                 | 4,09            |                 |
| ftsH             | lmo0220 | highly similar to cell division protein ftsH                                          | lin0252                      |                 | 7,96            | 2,95            |
| lmo0222          | lmo0222 | molecular chaperone Hsp33                                                             | lin0254                      |                 | 2,17            |                 |
| sul              | lmo0224 | highly similar to dihydropteroate synthases                                           | lin0256                      |                 | 2,53            |                 |
| folA             | lmo0225 | highly similar to dihydropteridine aldolase                                           | lin0257                      |                 | 2,84            |                 |
| folK             | lmo0226 | similar to 7,8-dihydro-6-hydroxymethylpterin pyrophosphokinase                        | lin0258                      |                 | 2,29            |                 |
| lmo0227          | lmo0227 | unknown protein                                                                       | lin0259                      |                 | 4,03            |                 |
| lysS             | lmo0228 | lysyl-tRNA synthetase                                                                 | lin0260, lysS                |                 | 3,77            |                 |
| mcsA             | lmo0230 | similar to B subtilis Yach protein                                                    | lin0262                      |                 | 2,87            |                 |
| mcsB             | lmo0231 | putative ATP:guanido phosphotransferase                                               | lin0263                      | 2,97            | 5,12            | 2,27            |
| clpC             | lmo0232 | endopeptidase Clp ATP-binding chain C                                                 | lin0264, clpC                | 3,32            | 4,27            |                 |
| ispF             | lmo0236 | 2-C-methyl-D-erythritol 2,4-cyclodiphosphate synthase                                 | lin0268, ispF                |                 | 4,48            |                 |
| glxX             | lmo0237 | highly similar to glutamyl-tRNA synthetase                                            | lin0269                      |                 | 3,41            |                 |
| secE             | lmo0245 | highly similar to preprotein translocase subunit                                      | lin0277                      |                 | 2,21            |                 |
| nusG             | lmo0246 | transcription antitermination protein NusG                                            | lin0278                      |                 | 2,69            |                 |
| rplK             | lmo0248 | ribosomal protein L11                                                                 | lin0280, rplK                | 5,45            | 6,75            | 3,81            |
| rplA             | lmo0249 | 50S ribosomal protein L1                                                              | lin0281, rplA                | 9,90            | 12,55           | 3,07            |
| rplJ             | lmo0250 | ribosomal protein L10                                                                 | lin0282, rplJ                | 5,69            | 6,92            |                 |
| rplL             | lmo0251 | 50S ribosomal protein L7/L12                                                          | lin0283, rplL                | 4,79            | 5,49            | 2,03            |
| lmo0257          | lmo0257 | unknown protein                                                                       |                              |                 | 2,12            |                 |
| rpoC             | lmo0259 | DNA-directed RNA polymerase beta' subunit                                             | lin0286, rpoC                |                 | 10,44           | 2,87            |
| inlH             | lmo0263 | internalin H                                                                          |                              | 3,08            | 6,60            | 2,41            |
| lmo0265          | lmo0265 | similar to succinylidiaminopimelate desuccinylase                                     | lin0289                      |                 | 2,31            |                 |
| lmo0278          | lmo0278 | similar to sugar ABC transporter, ATP-binding protein                                 | lin0304                      |                 | 3,30            |                 |
| ndrD             | lmo0279 | anaerobic ribonucleoside triphosphate reductase                                       | lin0305                      |                 | 5,71            | 2,90            |
| ndrG             | lmo0280 | highly similar to anaerobic ribonucleotide reductase activator protein                | lin0306                      |                 | 6,99            | 2,52            |
| lmo0301          | lmo0301 | similar to PTS beta-glucoside-specific enzyme IIA component                           | lin0329                      |                 | 9,46            |                 |
| lmo0303          | lmo0303 | putative secreted, lysin rich protein                                                 | lin0331                      |                 | 3,19            |                 |
| lmo0355          | lmo0355 | fumarate reductase                                                                    | lin0374                      | 2,98            | 6,69            | 2,51            |
| lmo0366          | lmo0366 | putative lipoprotein                                                                  | lin0385                      |                 | 2,70            | 2,17            |
| lmo0368          | lmo0368 | unknown protein                                                                       | lin0387                      |                 | 5,02            |                 |
| lmo0369          | lmo0369 | highly similar to B subtilis YeeI protein                                             | lin0388                      |                 | 4,22            | 2,60            |
| lmo0370          | lmo0370 | unknown protein                                                                       | lin0389                      |                 |                 | 2,76            |
| lmo0391          | lmo0391 | unknown protein                                                                       | lin0409                      | -4,68           |                 | -3,34           |
| lmo0408          | lmo0408 | unknown protein                                                                       | lin0411                      |                 |                 | -2,26           |
| lmo0411          | lmo0411 | phosphoenolpyruvate synthase                                                          | lin0431                      |                 | 3,44            |                 |
| pgdA             | lmo0415 | similar to endo-1,4-beta-xylanase                                                     | lin0436                      |                 | 14,32           | 3,69            |
| lstr             | lmo0422 | lineage-specific thermal regulator protein                                            | lin0442, lstr                |                 | 2,90            |                 |
| inlA             | lmo0433 | Internalin A                                                                          |                              |                 | 15,92           | 3,86            |
| inlB             | lmo0434 | Internalin B                                                                          |                              |                 | 3,82            | 2,55            |
| lmo0439          | lmo0439 | weakly similar to a module of peptide synthetase                                      | lin0460                      |                 | 2,76            |                 |
| lmo0443          | lmo0443 | similar to B subtilis transcription regulator LytR                                    | lin0463                      |                 | 2,41            |                 |
| lmo0452          | lmo0452 | unknown protein                                                                       | lin0469                      |                 | 2,96            |                 |
| lmo0471          | lmo0471 | unknown protein                                                                       |                              |                 | 3,18            |                 |
| lmo0481          | lmo0481 | unknown protein                                                                       | lin0483                      | 7,10            | 13,56           | 5,83            |
| lmo0483          | lmo0483 | unknown protein                                                                       | lin0485                      |                 | 6,02            |                 |
| lmo0484          | lmo0484 | unknown protein                                                                       | lin0487                      |                 | 2,66            |                 |
| rpmF-1           | lmo0486 | ribosomal protein L32                                                                 | lin0489, rpmF                |                 | 2,88            |                 |
| lmo0496          | lmo0496 | similar to B subtilis YnzC protein                                                    | lin0497                      |                 |                 | -2,00           |
| prs              | lmo0509 | similar to phosphoribosyl pyrophosphate synthetase                                    | lin0509                      |                 | 2,87            |                 |
| lmo0512          | lmo0512 | unknown protein                                                                       | lin0512                      | 10,45           | 26,38           |                 |
| lmo0516          | lmo0516 | similar to Bacillus anthracis encapsulation protein CapA                              | lin0516                      |                 | 14,26           |                 |
| lmo0539          | lmo0539 | tagatose 1,6-diphosphate aldolase                                                     | lin0543                      | 18,71           | 24,03           |                 |
| lmo0540          | lmo0540 | similar to penicillin-binding protein                                                 | lin0544                      |                 | 3,96            | 2,29            |
| lmo0541          | lmo0541 | similar to ABC transporter (binding protein)                                          | lin0545                      | 6,20            | 10,23           | 2,07            |
| lmo0558          | lmo0558 | unknown protein                                                                       | lin0567                      |                 | 2,33            |                 |
| lmo0580          | lmo0580 | weakly similar to carboxylesterase                                                    | lin0589                      |                 | 2,69            |                 |
| iap              | lmo0582 | P60 extracellular protein, invasion associated protein Iap                            | lin0591, iap                 | 34,64           | 28,54           | 2,05            |
| secA2            | lmo0583 | translocase                                                                           | lin0592                      |                 | 7,41            |                 |
| lmo0584          | lmo0584 | conserved hypothetical membrane protein                                               | lin0593                      |                 | 3,16            |                 |
| lmo0590          | lmo0590 | unknown protein                                                                       | lin0599                      |                 | 3,48            |                 |
| lmo0592          | lmo0592 | unknown protein                                                                       | lin0601                      | 33,87           | 18,41           |                 |
| lmo0593          | lmo0593 | similar to transport proteins (formate?)                                              | lin0602                      |                 | 2,32            |                 |
| metX             | lmo0594 | homoserine O-acetyltransferase                                                        | lin0603                      | 12,28           | 6,36            |                 |
| lmo0596          | lmo0596 | unknown protein                                                                       | lin0605                      | 23,31           | 68,15           |                 |
| lmo0597          | lmo0597 | similar to transcription regulator CRP/FNR family                                     | lin0606                      |                 | 80,90           | 42,16           |
| lmo0599          | lmo0599 | unknown protein                                                                       | lin0608                      |                 | 41,61           | 16,84           |
| lmo0600          | lmo0600 | unknown protein                                                                       | lin0609                      |                 | 4,64            | 5,63            |
| lmo0601          | lmo0601 | similar to cell surface protein                                                       | lin0610                      |                 | 3,31            | 5,56            |
| lmo0604          | lmo0604 | similar to B subtilis YvIA protein                                                    | lin0613                      | 51,45           | 27,43           |                 |
| lmo0606          | lmo0606 | similar to transcription regulator MarR family                                        | lin0615                      |                 | 2,93            |                 |
| lmo0607          | lmo0607 | similar ABC transporter, ATP-binding protein                                          | lin0616                      |                 | 2,60            |                 |
| lmo0608          | lmo0608 | similar to ABC transporter, ATP-binding protein                                       | lin0617                      | 12,16           | 7,07            |                 |
| lmo0609          | lmo0609 | similar to E coli phage shock protein E                                               | lin0618                      |                 | 13,83           | 6,76            |
| acpD             | lmo0611 | acyl carrier protein phosphodiesterase                                                | lin0620, acpD                |                 | 33,87           | 17,12           |
| lmo0612          | lmo0612 | similar to transcription regulator MarR family                                        | lin0621                      |                 | 33,32           | 14,53           |
| lmo0618          | lmo0618 | similar to protein kinase                                                             | lin0627                      |                 | 40,02           | 19,89           |
| lmo0619          | lmo0619 | unknown protein                                                                       | lin0628                      |                 | 32,90           | 16,81           |
| lmo0620          | lmo0620 | unknown protein                                                                       | lin0629                      |                 | 9,63            | 5,51            |
| lmo0621          | lmo0621 | unknown protein                                                                       | lin0630                      |                 | 102,28          | 47,85           |
| lmo0623          | lmo0623 | unknown protein                                                                       | lin0632                      |                 | 97,66           | 43,52           |
| lmo0624          | lmo0624 | unknown protein                                                                       | lin0633                      |                 |                 | 4,74            |

|         |         |                                                                                                 |               |        |        |        |
|---------|---------|-------------------------------------------------------------------------------------------------|---------------|--------|--------|--------|
| lmo0625 | lmo0625 | unknown protein                                                                                 | lin0634       | 25,50  | 13,86  |        |
| lmo0628 | lmo0628 | unknown protein                                                                                 | lin0637       | 17,27  | 9,55   |        |
| lmo0629 | lmo0629 | unknown protein                                                                                 | lin0638       | 3,97   | 3,63   |        |
| lmo0637 | lmo0637 | weakly similar to methyltransferase                                                             | lin0641       | 10,28  | 8,23   |        |
| lmo0639 | lmo0639 | similar to a transcription regulator (surface protein PAg negative regulator par)               | lin0642       | 58,04  | 22,73  |        |
| lmo0644 | lmo0644 | unknown protein                                                                                 | lin0647       | 11,66  | 10,42  |        |
| lmo0645 | lmo0645 | similar to amino acid transporter                                                               | lin0648       |        | 2,94   |        |
| lmo0646 | lmo0646 | unknown protein                                                                                 | lin0649       |        | 5,52   |        |
| lmo0648 | lmo0648 | similar to membrane proteins                                                                    | lin0651       | 83,42  | 35,45  |        |
| lmo0650 | lmo0650 | conserved membrane protein                                                                      | lin0653       | 24,09  | 13,30  |        |
| lmo0651 | lmo0651 | similar to transcription regulator                                                              | lin0654       | 157,28 | 73,20  |        |
| thiD    | lmo0662 | highly similar to phosphomethylpyrimidine kinase thiD                                           | lin0667       |        | 3,74   |        |
| lmo0663 | lmo0663 | unknown protein                                                                                 | lin0668       |        | 2,89   |        |
| mogR    | lmo0674 | unknown protein                                                                                 | lin0682       |        | 2,40   |        |
| flhF    | lmo0681 | similar to flagellar biosynthesis protein FlhF                                                  | lin0689       |        |        | -2,04  |
| flgE    | lmo0697 | flagellar hook protein FlgE                                                                     | lin0705       |        |        | -2,10  |
| lmo0721 | lmo0721 | putative fibronectin-binding protein                                                            | lin0729       | 5,92   | 15,24  |        |
| glmS    | lmo0727 | D-fructose-6-phosphate amidotransferase                                                         | lin0734       |        | 9,82   | 2,78   |
| lmo0764 | lmo0764 | similar to lipote-protein ligase                                                                | lin0758       |        | 3,56   |        |
| lmo0774 | lmo0774 | unknown protein                                                                                 | lin0768       |        | 4,01   |        |
| lmo0777 | lmo0777 | unknown protein                                                                                 | lin0771       |        | 2,61   |        |
| lmo0781 | lmo0781 | similar to mannose-specific phosphotransferase system (PTS) component IID                       | lin0774       |        | 2,57   |        |
| lmo0782 | lmo0782 | similar to mannose-specific phosphotransferase system (PTS) component IIC                       | lin0775       |        | 4,69   |        |
| lmo0783 | lmo0783 | similar to mannose-specific phosphotransferase system (PTS) component IIB                       | lin0776       |        | 3,82   |        |
| lmo0784 | lmo0784 | similar to mannose-specific phosphotransferase system (PTS) component IIA                       | lin0777       |        | 2,89   |        |
| lmo0788 | lmo0788 | unknown protein                                                                                 | lin0781       | 60,06  | 31,36  | 20,50  |
| lmo0794 | lmo0794 | similar to B subtilis YwnB protein                                                              | lin0787       |        | 4,47   |        |
| lmo0796 | lmo0796 | unknown protein                                                                                 | lin0789       |        | 4,21   |        |
| lmo0799 | lmo0799 | unknown protein                                                                                 | lin0792       |        | 3,02   |        |
| scrK    | lmo0813 | similar to Fructokinases                                                                        | lin0809       | 19,38  | 10,05  | 7,45   |
| uhpT    | lmo0838 | hexose phosphate transport protein                                                              | lin0831       |        | 5,13   | 2,59   |
| lmo0840 | lmo0840 | unknown protein                                                                                 | lin0831       | 11,78  | 5,72   | 5,56   |
| lmo0841 | lmo0841 | similar to cation (calcium) transporting ATPase                                                 | lin0832       |        |        | 2,06   |
| lmo0848 | lmo0848 | similar to amino acid ABC transporter, ATP-binding protein                                      | lin0841       | 20,94  | 10,77  | 8,22   |
| lmo0866 | lmo0866 | similar to ATP-dependent RNA helicase                                                           | lin0859       |        | 3,38   |        |
| lmo0876 | lmo0876 | similar to PTS system, Lichenan-specific enzyme IIC component                                   | lin0874       | 102,02 | 46,02  | 30,54  |
| rsbU    | lmo0892 | highly similar to serine phosphatase RsbU                                                       | lin0891       |        | 2,44   |        |
| rsbX    | lmo0896 | Indirect negative regulation of sigma B dependant gene expression (serine phosphatase)          | lin0895, rsbX |        | 2,79   |        |
| lmo0907 | lmo0907 | similar to phosphoglycerate mutase                                                              | lin0907       |        | 3,12   |        |
| lmo0909 | lmo0909 | similar to transcription regulator, GntR family                                                 | lin0909       | 14,74  | 29,14  |        |
| lmo0915 | lmo0915 | similar to phosphotransferase system enzyme IIC                                                 |               | 3,15   |        | 2,37   |
| lmo0927 | lmo0927 | hypothetical transmembrane protein                                                              | lin0927       |        | 3,18   |        |
| lmo0937 | lmo0937 | unknown protein                                                                                 | lin0936       |        | 3,92   |        |
| lmo0939 | lmo0939 | unknown protein                                                                                 | lin0938       |        | 3,73   |        |
| fri     | lmo0943 | non-heme iron-binding ferritin                                                                  | lin0942, fri  |        | 13,06  | 4,04   |
| lmo0944 | lmo0944 | similar to B subtilis YneR protein                                                              | lin0943       |        | 2,93   |        |
| lmo0964 | lmo0964 | similar to B subtilis YjBH protein                                                              | lin0963       |        | 4,37   |        |
| lmo0969 | lmo0969 | similar to ribosomal large subunit pseudouridine synthetase                                     | lin0968       |        | 6,37   |        |
| fabI    | lmo0970 | enoyl-(acyl carrier protein) reductase                                                          | lin0969       |        | 3,26   |        |
| dltD    | lmo0971 | DltD protein for D-alanine esterification of lipoteichoic acid and wall teichoic acid           | lin0970, dltD | 11,98  | 21,95  | 3,73   |
| dltC    | lmo0972 | D-alanine--poly(phosphoribitol) ligase subunit 2 DltC                                           | lin0971, dltC | 4,13   | 6,22   | 2,35   |
| dltB    | lmo0973 | DltB protein for D-alanine esterification of lipoteichoic acid and wall teichoic acid           | lin0972, dltB | 6,48   | 7,58   | 2,73   |
| dltA    | lmo0974 | D-alanine--D-alanyl carrier protein ligase DltA                                                 | lin0973, dltA |        | 6,37   | 3,85   |
| lmo0976 | lmo0976 | similar to B subtilis YjCF protein                                                              | lin0975       | 7,06   | 4,60   | 3,54   |
| lmo0977 | lmo0977 | similar to B subtilis YjCH protein                                                              | lin0976       |        | 2,57   |        |
| ilvE    | lmo0978 | branched-chain amino acid aminotransferase                                                      | lin0977       | 92,93  | 40,45  | 27,05  |
| lmo0994 | lmo0994 | unknown protein                                                                                 | lin0993       |        | 2,53   |        |
| clpE    | lmo0997 | ATP-dependent protease                                                                          | lin0996, clpE | 2,64   | 6,31   | 2,41   |
| ptsH    | lmo1002 | PTS phosphocarrier protein Hpr (histidine containing protein)                                   | lin1001, ptsH | 2,72   | 4,26   | 2,04   |
| ptsI    | lmo1003 | phosphotransferase system enzyme I                                                              | lin1002       |        | 3,02   |        |
| lmo1006 | lmo1006 | similar to aminotransferases (to B subtilis PatA protein)                                       | lin1005       |        | 2,36   |        |
| lmo1011 | lmo1011 | similar to tetrahydrodipicolinate succinylase                                                   | lin1010       |        | 4,72   |        |
| def     | lmo1051 | peptide deformylase                                                                             | lin1043, def  | 40,34  | 19,14  | 13,47  |
| pdhC    | lmo1054 | dihydropyrimidine dehydrogenase E3 subunit of pyruvate dehydrogenase complex                    | lin1046       |        | 8,99   | 2,25   |
| typA    | lmo1067 | similar to GTP-binding elongation factor                                                        | lin1055       |        | 6,43   | 2,52   |
| lmo1070 | lmo1070 | similar to B subtilis YlaH protein                                                              | lin1058       | 48,83  | 22,60  | 18,13  |
| lmo1075 | lmo1075 | similar to teichoic acid translocation ATP-binding protein TagH (ABC transporter)               | lin1063       | 9,28   | 5,48   | 4,20   |
| lmo1081 | lmo1081 | similar to glucose-1-phosphate thymidyl transferase                                             |               | 8,25   | 5,99   | 5,17   |
| lmo1082 | lmo1082 | similar to dTDP-sugar epimerase                                                                 |               | 47,21  | 24,06  | 21,01  |
| lmo1083 | lmo1083 | similar to dTDP-D-glucose 4,6-dehydratase                                                       |               |        | 3,49   |        |
| lmo1084 | lmo1084 | similar to dTDP-L-rhamnose synthetase                                                           |               |        | 3,89   |        |
| ispD    | lmo1086 | 2-C-methyl-D-erythritol 4-phosphate cytidylyltransferase                                        | lin1071, ispD |        | 2,66   |        |
| lmo1087 | lmo1087 | similar to glucitol dehydrogenase                                                               | lin1072       | 6,66   | 4,16   | 4,25   |
| nadE    | lmo1093 | NAD(+) synthetase                                                                               | lin1078, nadE |        | 4,25   |        |
| lmo1094 | lmo1094 | unknown protein                                                                                 | lin1079       |        | 3,25   |        |
| guaA    | lmo1096 | bifunctional GMP synthase/glutamine amidotransferase protein                                    | lin1081, guaA |        | 2,72   |        |
| lmo1099 | lmo1099 | similar to a protein encoded by Tn916                                                           |               | 65,42  | 30,42  | 24,04  |
| lme1102 | lmo1102 | similar to cadmium efflux system accessory proteins                                             | lin1106       | 9,71   | 4,51   | 4,72   |
| pduS    | lmo1142 | similar to Salmonella enterica PduS protein                                                     | lin1107       | -3,10  |        | -2,44  |
| pduT    | lmo1143 | similar to Salmonella enterica PduT protein                                                     | lin1108       |        | -2,30  |        |
| pduU    | lmo1144 | similar to Salmonella enterica PduU protein                                                     | lin1109       |        | -2,87  |        |
| pduV    | lmo1145 | similar to Salmonella enterica PduV protein                                                     | lin1110       |        | -2,38  |        |
| lmo1146 | lmo1146 | unknown protein                                                                                 | lin1110       | -5,87  | -5,33  | -5,48  |
| cobU    | lmo1147 | similar to bifunctional cobalamin biosynthesis protein CopB                                     | lin1111       | -5,13  | -6,07  | -5,61  |
| cobS    | lmo1148 | highly similar to cobalamin (5'-phosphatase) synthetase                                         | lin1112       | -10,33 | -12,33 | -10,58 |
| cobC    | lmo1149 | similar to alpha-ribazole-5'-phosphatase                                                        | lin1113       | -5,60  | -7,79  | -5,85  |
| pocR    | lmo1150 | Regulatory protein similar to Salmonella typhimurium PocR protein                               | lin1114       | -4,06  | -4,31  | -3,42  |
| pduA-1  | lmo1151 | similar to Salmonella typhimurium PduA protein                                                  | lin1115       | -3,68  | -4,62  | -3,76  |
| pduB    | lmo1152 | similar to Salmonella typhimurium PduB protein                                                  | lin1116       | -10,81 | -13,62 | -12,38 |
| pduC    | lmo1153 | highly similar to propanediol dehydratase, alpha subunit                                        | lin1130       | -7,84  | -8,03  | -7,30  |
| pduD    | lmo1154 | similar to diol dehydratase (diol dehydratase) gamma subunit                                    | lin1117       | -5,91  | -6,30  | -5,72  |
| pduG    | lmo1156 | similar to diol dehydratase-reactivating factor large subunit                                   | lin1118       |        | -11,42 | -12,30 |
| pduH    | lmo1157 | similar to diol dehydratase-reactivating factor small chain                                     | lin1120       | -4,26  | -5,80  | -5,79  |
| pduK    | lmo1158 | similar to Salmonella enterica PduK protein                                                     | lin1121       | -3,25  | -3,47  | -2,75  |
| pduA-2  | lmo1159 | similar to carboxysome structural protein                                                       | lin1122       | -6,22  | -6,41  | -4,61  |
| pduL    | lmo1160 | similar to Salmonella enterica PduL protein                                                     | lin1123       | -4,26  | -3,96  | -4,21  |
| eutJ    | lmo1161 | similar to ethanolamine utilization protein EutJ                                                | lin1124       | -4,97  | -5,28  | -4,84  |
| pduM    | lmo1162 | similar to Salmonella enterica PduM propanediol utilization protein                             | lin1125       | -14,00 | -11,93 | -13,46 |
| eutN    | lmo1163 | similar to Salmonella enterica EutN ethanolamine utilization protein                            | lin1126       | -4,91  | -5,17  | -4,40  |
| pduO    | lmo1164 | highly similar to Salmonella enterica PduO protein                                              | lin1127       | 72,21  | 33,09  | 17,85  |
| eutE    | lmo1165 | similar to ethanolamine utilization protein EutE                                                | lin1128       | -3,84  | -3,68  | -3,40  |
| pduQ-1  | lmo1166 | similar to Salmonella enterica PduQ putative propanol dehydrogenase                             | lin1129       | -8,66  | -8,43  | -8,28  |
| glpF    | lmo1167 | similar to glycerol uptake facilitator protein                                                  | lin1130       | -7,84  | -8,03  | -7,30  |
| AckA2   | lmo1168 | similar to acetate kinase                                                                       | lin1131       | -11,94 | -11,42 | -12,30 |
| cobD    | lmo1169 | L-threonine-O-3-phosphate decarboxylase                                                         | lin1132       | -4,57  | -4,59  | -4,00  |
| pduX    | lmo1170 | similar to Salmonella enterica PduX protein                                                     | lin1133       | -4,49  | -5,01  | -4,58  |
| pduQ-2  | lmo1171 | similar to NADPH-dependent butanol dehydrogenase                                                | lin1134       | -4,25  | -5,16  | -3,60  |
| lmo1172 | lmo1172 | similar to similar to two-component response regulator                                          | lin1135       | -5,33  | -4,35  | -5,80  |
| lmo1173 | lmo1173 | similar to two-component sensor histidine kinase                                                | lin1136       | -4,15  |        | -4,66  |
| eutA    | lmo1174 | similar to ethanolamine utilization protein EutA (putative chaperonin)                          | lin1137       | -4,27  | -4,20  | -4,83  |
| eutB    | lmo1175 | similar to ethanolamine ammonia-lyase, heavy chain                                              | lin1138       | -6,39  | -5,86  | -6,60  |
| eutC    | lmo1176 | ethanolamine ammonia-lyase small subunit                                                        | lin1139       |        | -2,32  |        |
| eutL    | lmo1177 | similar to putative carboxysome structural protein (eutL)                                       | lin1140       | -3,85  | -4,50  | -4,50  |
| lmo1179 | lmo1179 | similar to acetaldehyde dehydrogenase / alcohol dehydrogenase                                   | lin1141       | -4,88  | -3,41  | -6,35  |
| lmo1180 | lmo1180 | similar to putative carboxysome structural protein                                              | lin1143       | 47,44  | 16,19  | 12,33  |
| lmo1181 | lmo1181 | similar to cobalamin adenosyl transferase                                                       | lin1144       |        | -3,29  | -3,31  |
| pduL-2  | lmo1182 | similar to Salmonella enterica PduL protein                                                     | lin1145       |        | -2,96  |        |
| cbiA    | lmo1191 | cobyrinic acid a,c-diamide synthase                                                             | lin1146       | -3,18  |        | -2,50  |
| cbiB    | lmo1192 | cobalamin biosynthesis protein                                                                  | lin1154       |        |        | -2,00  |
| cbiD    | lmo1194 | cobalt-precorrin-6A synthase                                                                    | lin1155, cbiB |        |        | -2,71  |
| cbiO    | lmo1207 | similar to cobalt transport ATP-binding protein CbiO                                            | lin1157       |        |        | -2,16  |
| pheT    | lmo1222 | phenylalanyl-tRNA synthetase beta subunit                                                       | lin1170       | 7,58   |        | 18,32  |
| lmo1250 | lmo1250 | similar to antibiotic resistance protein                                                        | lin1170       |        |        |        |
| lmo1272 | lmo1272 | conserved hypothetical protein similar to B subtilis YlqF protein (ribosomal biogenesis GTPase) | lin1185, pheT |        | 6,43   |        |
| codV    | lmo1277 | similar to integrase/recombinase                                                                | lin1217       |        |        | 2,84   |
| lmo1290 | lmo1290 | similar to internalin proteins, putative peptidoglycan bound protein (LPXTG motif)              | lin1311       | 5,91   | 3,47   | 18,12  |
|         |         |                                                                                                 | lin1316       |        | 2,69   | 6,24   |

|         |         |                                                                                     |               |       |       |
|---------|---------|-------------------------------------------------------------------------------------|---------------|-------|-------|
| lmo1291 | lmo1291 | similar to acyltransferase (to B subtilis YrHL protein)                             | lin1329       | 4,73  |       |
| glpD    | lmo1293 | similar to glycerol 3 phosphate dehydrogenase                                       | lin1331       | 3,47  |       |
| miaA    | lmo1294 | similar to tRNA isopentenylpyrophosphate transferase                                | lin1332       | 2,33  |       |
| lmo1297 | lmo1297 | similar to aluminum resistance protein and to B subtilis YnB protein (hypothetical) | lin1335       | 17,17 | 41,32 |
| glrR    | lmo1298 | similar to glutamine synthetase repressor                                           | lin1336       | 3,25  | 8,22  |
| glrA    | lmo1299 | highly similar to glutamine synthetases                                             | lin1337       | 2,63  | 4,11  |
| lmo1301 | lmo1301 | unknown protein                                                                     | lin1339       |       | 4,10  |
| lexA    | lmo1302 | LexA repressor                                                                      | lin1340       | 6,20  | 13,96 |
| lmo1306 | lmo1306 | highly similar to B subtilis YneF protein                                           | lin1344       | 3,40  | 6,55  |
| pyrH    | lmo1313 | highly similar to uridylylase kinases                                               | lin1350       |       | 3,05  |
| frr     | lmo1314 | highly similar to ribosome recycling factors                                        | lin1351       |       | 2,68  |
| uppS    | lmo1315 | similar to undecaprenyl diphosphate synthase                                        | lin1352       |       | 2,16  |
| lmo1326 | lmo1326 | conserved hypothetical protein similar to B subtilis YlxP protein                   | lin1363       | 11,24 | 4,33  |
| lmo1342 | lmo1342 | similar to B subtilis comG operon protein 6                                         | lin1379       |       | 2,43  |
| comGE   | lmo1343 | similar to comG operon protein 5 (comGE)                                            | lin1380       |       | 8,30  |
| lmo1352 | lmo1352 | unknown protein                                                                     | lin1389       | 7,23  | 14,73 |
| lmo1354 | lmo1354 | similar to aminopeptidase P                                                         | lin1391       | 4,97  | 2,97  |
| cspl    | lmo1364 | similar to cold shock protein                                                       | lin1401       |       | 11,70 |
| tcsA    | lmo1388 | CD4+ T cell-stimulating antigen, lipoprotein                                        | lin1425, tcsA |       | 2,02  |
| lmo1395 | lmo1395 | unknown protein                                                                     | lin1432       |       | 2,19  |
| mutL    | lmo1404 | DNA mismatch repair protein                                                         | lin1441, mutL |       | 2,42  |
| pfIB    | lmo1406 | pyruvate formate-lyase                                                              | lin1443, pfIB |       | 7,80  |
| pfIC    | lmo1407 | pyruvate-formate lyase activating enzyme                                            | lin1444, pfIC |       | 3,63  |
| lmo1423 | lmo1423 | unknown protein                                                                     | lin1462       | 4,22  | 4,32  |
| lmo1424 | lmo1424 | putative manganese transport protein MntH                                           | lin1463       |       | 2,66  |
| opuCD   | lmo1425 | osmoprotectant transport system permease protein                                    | lin1464       |       | 26,53 |
| lmo1431 | lmo1431 | similar to ABC transporter (ATP-binding protein)                                    | lin1470       |       | 10,22 |
| lmo1432 | lmo1432 | unknown protein                                                                     | lin1471       |       | 2,69  |
| lmo1434 | lmo1434 | unknown protein                                                                     | lin1472       |       | 3,45  |
| lmo1438 | lmo1438 | similar to penicillin-binding protein                                               | lin1473       |       | 3,25  |
| sod     | lmo1439 | superoxide dismutase                                                                | lin1477       |       | 4,17  |
| lmo1440 | lmo1440 | unknown protein                                                                     | lin1478, sod  | 4,51  | 3,55  |
| lmo1466 | lmo1466 | unknown protein                                                                     | lin1479       |       | 13,84 |
| lmo1468 | lmo1468 | unknown protein                                                                     | lin1503       | 6,36  | 2,42  |
| dnaK    | lmo1473 | class I heat-shock protein (molecular chaperone) DnaK                               | lin1505       |       | 17,07 |
| grpE    | lmo1474 | heat shock protein GrpE                                                             | lin1505       |       | 6,78  |
| comEB   | lmo1483 | similar to B subtilis ComEB protein                                                 | lin1510, dnaK |       | 2,48  |
| comEA   | lmo1484 | similar to integral membrane protein ComEA                                          | lin1511, grpE |       | 6,69  |
| lmo1492 | lmo1492 | unknown protein                                                                     | lin1518       |       | 2,07  |
| udk     | lmo1497 | uridine kinase                                                                      | lin1519       | 5,50  | 5,13  |
| lmo1499 | lmo1499 | unknown protein                                                                     | lin1527       | 21,55 | 14,06 |
| lmo1502 | lmo1502 | unknown protein                                                                     | lin1532       |       | 52,50 |
| lmo1503 | lmo1503 | unknown protein                                                                     | lin1534       | 21,03 | 44,64 |
| trmJ    | lmo1512 | similar to putative tRNA (5-methylaminomethyl-2-thiouridylyl)-methyltransferase     | lin1537       |       | 7,30  |
| lmo1518 | lmo1518 | lmo1518                                                                             | lin1538       |       | 2,57  |
| lmo1521 | lmo1521 | similar to N-acetylmuramoyl-L-alanine amidase                                       | lin1547       |       | 2,95  |
| pheA    | lmo1536 | prephenate dehydratase                                                              | lin1553       |       | 2,73  |
| lmo1537 | lmo1537 | conserved GTP binding protein                                                       | lin1556       |       | 3,49  |
| glpK    | lmo1538 | glycerol kinase                                                                     | lin1571       |       | 4,55  |
| rpmA    | lmo1540 | 50S ribosomal protein L27                                                           | lin1572       |       | 2,59  |
| lmo1541 | lmo1541 | unknown protein                                                                     | lin1573       |       | 3,96  |
| rplU    | lmo1542 | ribosomal protein L21                                                               | lin1575, rpmA |       | 2,95  |
| mreB    | lmo1547 | similar to cell-shape determining protein MreB                                      | lin1576       | 2,95  | 4,02  |
| mreC    | lmo1548 | similar to cell-shape determining protein MreC                                      | lin1577, rplU | 4,71  | 8,12  |
| dnaB    | lmo1561 | chromosome replication initiation / membrane attachment protein DnaB                | lin1581       |       | 2,44  |
| lmo1562 | lmo1562 | transcriptional regulator NrdR                                                      | lin1582       |       | 4,07  |
| citC    | lmo1566 | isocitrate dehydrogenase                                                            | lin1596, dnaB |       | 5,31  |
| pepQ    | lmo1578 | similar to X-Pro dipeptidase                                                        | lin1597       |       | 6,57  |
| thiI    | lmo1592 | similar to thiamin biosynthesis protein ThiI                                        | lin1601       |       | 2,04  |
| rpsD    | lmo1596 | 30S ribosomal protein S4                                                            | lin1613       |       | 5,25  |
| aroA    | lmo1600 | 3-deoxy-7-phosphoheptulonate synthase                                               | lin1634       |       | 6,37  |
| lmo1601 | lmo1601 | similar to general stress protein                                                   | lin1638, rpsD | 7,35  | 14,30 |
| lmo1602 | lmo1602 | unknown protein                                                                     | lin1641, aroA |       | 4,08  |
| murC    | lmo1605 | UDP-N-acetylmuramate--L-alanine ligase                                              | lin1642       |       | 2,18  |
| lmo1606 | lmo1606 | similar to DNA translocase                                                          | lin1643       |       | 2,13  |
| trmB    | lmo1615 | tRNA (guanine-N(7)-)-methyltransferase                                              | lin1646       |       | 2,40  |
| lmo1616 | lmo1616 | unknown protein                                                                     | lin1647       |       | 7,73  |
| adhE    | lmo1634 | similar to Alcohol-acetaldehyde dehydrogenase                                       | lin1656       |       | 6,71  |
| tag     | lmo1639 | similar to dna-3-methyladenine glycosidase                                          | lin1657       |       | 2,87  |
| citB    | lmo1641 | aconitate hydratase                                                                 | lin1675       | 4,81  | 12,76 |
| lmo1643 | lmo1643 | unknown protein                                                                     | lin1680       |       | 3,38  |
| lmo1649 | lmo1649 | unknown protein                                                                     | lin1682       |       | 4,30  |
| lmo1650 | lmo1650 | unknown protein                                                                     | lin1684       |       | 2,14  |
| tsf     | lmo1657 | elongation factor Ts EF-Ts                                                          | lin1689       |       | 5,10  |
| rpsB    | lmo1658 | 30S ribosomal protein S2                                                            | lin1690       |       | 3,38  |
| leuS    | lmo1660 | leucyl-tRNA synthetase                                                              | lin1766, tsf  |       | 2,33  |
| lmo1665 | lmo1665 | unknown protein                                                                     | lin1767, rpsB |       | 4,79  |
| menD    | lmo1675 | 2-oxoglutarate decarboxylase                                                        | lin1769, leuS |       | 7,52  |
| lmo1677 | lmo1677 | 1,4-dihydroxy-2-naphthoate octaprenyltransferase                                    | lin1774       |       | 2,38  |
| lmo1687 | lmo1687 | unknown protein                                                                     | lin1775       |       | 3,30  |
| lmo1688 | lmo1688 | enoyl-(acyl carrier protein) reductase                                              | lin1783       |       | 3,31  |
| lmo1690 | lmo1690 | unknown protein                                                                     | lin1785       |       | 3,19  |
| recX    | lmo1693 | recombination regulator RecX                                                        | lin1795       |       | 4,01  |
| mprF    | lmo1695 | similar to MprF protein of S aureus                                                 | lin1796       |       | 2,70  |
| lmo1701 | lmo1701 | unknown protein                                                                     | lin1798       |       | 6,10  |
| lmo1703 | lmo1703 | similar to similar to RNA methyltransferases                                        | lin1801       |       | 2,40  |
| lmo1705 | lmo1705 | similar to deoxyguanosine kinase/deoxyadenosine kinase(I) subunit                   | lin1803       | 9,68  | 4,59  |
| lmo1711 | lmo1711 | highly similar to aminopeptidases                                                   | lin1809       |       | 2,83  |
| lmo1713 | lmo1713 | similar to cell-shape determining protein mreB                                      | lin1815       |       | 3,52  |
| lmo1716 | lmo1716 | similar to putative transcription regulators                                        | lin1817       |       | 4,97  |
| lmo1721 | lmo1721 | similar to transcriptional regulator (NFA/NtrC family)                              | lin1823       |       | 2,77  |
| lmo1722 | lmo1722 | similar to ATP-dependent RNA helicases                                              | lin1825       |       | 5,82  |
| lmo1728 | lmo1728 | some similarities to cellobiose-phosphorylase                                       | lin1827       |       | 8,61  |
| bglX    | lmo1729 | similar to beta-glucosidases                                                        | lin1832       |       | 2,04  |
| virS    | lmo1741 | similar to two-component sensor histidine kinase                                    | lin1833       | 3,69  |       |
| adeC    | lmo1742 | highly similar to adenine deaminases                                                | lin1839       |       | -2,03 |
| virR    | lmo1745 | similar to two-component response regulator                                         | lin1840       | 8,84  | 24,80 |
| lmo1751 | lmo1751 | similar to hypothetical RNA methyltransferase                                       | lin1852       |       | 2,76  |
| lmo1752 | lmo1752 | unknown protein                                                                     | lin1853       |       | 2,66  |
| lmo1753 | lmo1753 | unknown protein                                                                     | lin1856       |       | 5,96  |
| pcrB    | lmo1760 | PcrB-like protein                                                                   | lin1863       |       | 3,41  |
| lmo1761 | lmo1761 | similar to putative sodium-dependent transporter                                    | lin1864       |       | 3,44  |
| purD    | lmo1764 | phosphoribosylglycinamide synthetase                                                | lin1865       |       | 8,41  |
| pepT    | lmo1780 | peptidase T                                                                         | lin1872       |       | 2,78  |
| exoA    | lmo1782 | similar to 3'-exo-deoxyribonuclease exoA                                            | lin1873       | 16,59 | 42,54 |
| rplT    | lmo1783 | 50S ribosomal protein L20                                                           | lin1876, purD |       | 2,26  |
| infC    | lmo1785 | translation initiation factor IF-3                                                  | lin1892       |       | 2,52  |
| infC    | lmo1786 | internalin C                                                                        | lin1894       |       | 2,35  |
| lmo1791 | lmo1791 | unknown protein                                                                     | lin1895, rplT |       | 2,61  |
| trmD    | lmo1792 | similar to E coli tRNA (guanine-N1) methyltransferase                               | lin1897, infC |       | 5,70  |
| rpsP    | lmo1797 | ribosomal protein S16                                                               | lin1905       |       | 2,06  |
| sdhA    | lmo1812 | similar to L-serine dehydratase                                                     | lin1906       |       | 8,56  |
| lmo1817 | lmo1817 | weakly similar to thiamin pyrophosphokinase                                         | lin1911, rpsP | 3,17  | 3,57  |
| rpe-2   | lmo1818 | ribulose-phosphate 3-epimerase                                                      | lin1926       | -4,06 | 4,03  |
| lmo1819 | lmo1819 | ribosome-associated GTPase                                                          | lin1931       |       | 4,96  |
| lmo1821 | lmo1821 | similar to putative phosphoprotein phosphatase                                      | lin1932       |       | -4,17 |
| sun     | lmo1822 | similar to RNA-binding Sun protein                                                  | lin1933       |       | -3,10 |
| fnt     | lmo1823 | similar to methionyl-tRNA formyltransferase                                         | lin1935       | -4,75 | -2,04 |
| priA    | lmo1824 | primosome assembly protein PriA                                                     | lin1936       |       | -4,31 |
| coaBC   | lmo1825 | similar to pantothenate metabolism flavoprotein homolog                             | lin1937       |       | -2,52 |
| lmo1828 | lmo1828 | unknown protein                                                                     | lin1938       | -3,66 | -3,42 |
| fbpA    | lmo1829 | similar to fibronectin binding proteins                                             | lin1939       |       | -4,11 |
| lmo1830 | lmo1830 | unknown protein                                                                     | lin1942       |       | -2,27 |
| pyrE    | lmo1831 | orotate phosphoribosyltransferase                                                   | lin1943       | -3,50 | -2,69 |
| pyrF    | lmo1832 | highly similar to orotidine 5'-phosphate decarboxylases                             | lin1944       |       | -3,61 |
| pyrD    | lmo1833 | highly similar to dihydroorotase dehydrogenase                                      | lin1945, pyrE | -3,09 | -2,56 |
|         |         |                                                                                     | lin1946       |       | -3,55 |
|         |         |                                                                                     | lin1947       |       | -3,42 |
|         |         |                                                                                     |               |       | -3,24 |

|         |         |                                                                                          |                |       |       |       |
|---------|---------|------------------------------------------------------------------------------------------|----------------|-------|-------|-------|
| pyrDII  | lmo1834 | highly similar to dihydroorotate dehydrogenase (electron transfer subunit)               | lin1948        | -5,85 | -6,38 | -6,12 |
| pyrAb   | lmo1835 | carbamoyl-phosphate synthase large subunit                                               | lin1949, carB  | -4,27 | -4,09 | -4,06 |
| pyrAa   | lmo1836 | carbamoyl-phosphate synthase small subunit                                               | lin1950        | -3,67 | -3,58 | -3,78 |
| pyrC    | lmo1837 | dihydroorotase                                                                           | lin1951, pyrC  | -3,70 | -4,14 | -3,72 |
| pyrP    | lmo1839 | highly similar to uracil permease                                                        | lin1953        | -3,45 | -3,35 | -3,52 |
| ispA    | lmo1844 | signal peptidase II                                                                      | lin1958, ispA  |       |       | -2,01 |
| lmo1845 | lmo1845 | unknown protein                                                                          | lin1959        |       |       | -2,13 |
| lpeA    | lmo1847 | similar to adhesion binding proteins and lipoproteins                                    | lin1961        | 6,55  | 31,08 | 10,64 |
| lmo1848 | lmo1848 | similar metal cations ABC transporter (permease protein)                                 | lin1962        |       | 9,93  | 2,86  |
| lmo1849 | lmo1849 | similar to metal cations ABC transporter, ATP-binding proteins                           | lin1963        | 3,34  | 17,86 | 5,57  |
| lmo1851 | lmo1851 | similar to carboxy-terminal processing proteinase                                        | lin1965        |       |       | -2,12 |
| lmo1855 | lmo1855 | similar to similar to D-alanyl-D-alanine carboxypeptidases                               | lin1969        |       | 3,31  |       |
| msrA    | lmo1860 | methionine sulfoxide reductase A                                                         | lin1974        |       | 2,64  |       |
| lmo1869 | lmo1869 | similar to conserved hypothetical proteins, putative integral membrane protein           | lin1983        |       |       | -2,41 |
| lmo1871 | lmo1871 | similar to phosphoglucomutases                                                           | lin1985        | -3,93 | -4,23 | -3,77 |
| lmo1872 | lmo1872 | similar to methyltransferases                                                            | lin1986        | -3,80 | -4,10 | -3,89 |
| lmo1883 | lmo1883 | similar to chitinases                                                                    | lin1996        |       |       | -2,44 |
| ansB    | lmo1896 | asparaginyl-tRNA synthetase                                                              | lin2010        |       | 5,15  |       |
| hup     | lmo1934 | similar to non-specific DNA-binding protein HU                                           | lin2048        |       | 5,21  |       |
| rpsA    | lmo1938 | similar to ribosomal protein S1                                                          | lin2052        |       | 5,25  |       |
| resD    | lmo1948 | similar to two-component response regulator (ResD)                                       | lin2062        |       | 4,09  |       |
| xerD    | lmo1955 | similar to integrase/recombinase                                                         | lin2069        |       | 2,76  |       |
| fur     | lmo1956 | similar to transcriptional regulator (Fur family)                                        | lin2070        |       | 7,68  | 2,71  |
| lmo1962 | lmo1962 | similar to transcription regulators (TetR family)                                        | lin2076        |       | 2,83  |       |
| lmo1966 | lmo1966 | unknown protein                                                                          | lin2080        |       | 3,15  |       |
| lmo1967 | lmo1967 | similar to toxic ion resistance proteins                                                 | lin2081        |       | 4,73  |       |
| ilvN    | lmo1985 | similar to acetolactate synthase (acetohydroxy-acid synthase) (small subunit)            | lin2092        |       | 8,42  |       |
| alsS    | lmo2006 | alpha-acetolactate synthase                                                              | lin2114        |       | 2,43  |       |
| cspB    | lmo2016 | similar to major cold-shock protein                                                      | lin2124        |       | 3,66  |       |
| divIVA  | lmo2020 | similar to cell-division initiation protein (septum placement)                           | lin2128        |       | 3,30  |       |
| nadC    | lmo2024 | nicotinate-nucleotide pyrophosphorylase                                                  | lin2132        |       | 6,56  |       |
| nadA    | lmo2025 | quinolinate synthetase                                                                   | lin2133        |       | 4,07  |       |
| lmo2028 | lmo2028 | unknown protein                                                                          | lin2134        |       | 5,25  |       |
| lmo2029 | lmo2029 | unknown protein                                                                          | lin2135        | 4,35  | 6,03  |       |
| lmo2030 | lmo2030 | unknown protein                                                                          | lin2136        |       | 2,14  |       |
| pbpB    | lmo2039 | penicillin binding protein 2B                                                            | lin2145        |       | 5,00  |       |
| rpmF-2  | lmo2047 | 50S ribosomal protein L32                                                                | lin2153, rpmF  |       | 1,78  |       |
| lmo2048 | lmo2048 | unknown protein                                                                          | lin2154        |       | 4,93  | 2,51  |
| ctaA    | lmo2058 | similar to heme O oxygenase                                                              | lin2164        |       | 3,59  |       |
| groEL   | lmo2068 | chaperonin GroEL                                                                         | lin2174, groEL |       | 5,59  | 2,01  |
| rex     | lmo2072 | redox-sensing transcriptional repressor Rex                                              | lin2178        |       | 2,68  |       |
| rimI    | lmo2076 | similar to ribosomal protein alanine acetyltransferase                                   | lin2182        |       | 2,53  |       |
| lmo2077 | lmo2077 | similar to glycoprotease                                                                 | lin2183        |       | 6,60  |       |
| lmo2078 | lmo2078 | unknown protein                                                                          | lin2184        |       | 4,68  |       |
| lmo2083 | lmo2083 | unknown protein                                                                          | lin2189        |       | 6,47  |       |
| lmo2101 | lmo2101 | pyridoxine biosynthesis protein                                                          | lin2205        |       | 2,93  |       |
| lmo2102 | lmo2102 | glutamine amidotransferase subunit PdxT                                                  | lin2206        | 2,77  | 4,10  |       |
| lmo2114 | lmo2114 | similar to ABC transporter (ATP-binding protein)                                         | lin2219        |       | 3,68  | 2,93  |
| lmo2115 | lmo2115 | similar to ABC transporter (permease)                                                    | lin2220        | 4,86  | 5,92  | 3,06  |
| lmo2119 | lmo2119 | unknown protein                                                                          | lin2224        |       | 4,43  |       |
| lmo2120 | lmo2120 | unknown protein                                                                          | lin2225        |       | 2,37  |       |
| lmo2133 | lmo2133 | similar to fructose-1,6-biphosphate aldolase type II                                     | lin2238        |       | 5,19  |       |
| lmo2148 | lmo2148 | unknown protein                                                                          | lin2252        |       | 2,93  |       |
| lmo2152 | lmo2152 | similar to thioredoxin                                                                   | lin2256        |       | 5,98  | 2,27  |
| lmo2153 | lmo2153 | flavodoxin                                                                               | lin2257        |       | 10,57 | 4,55  |
| nrdf    | lmo2154 | ribonucleotide-diphosphate reductase beta subunit                                        | lin2258        |       | 5,82  | 2,13  |
| nrda    | lmo2155 | ribonucleotide-diphosphate reductase alpha subunit                                       | lin2259        |       | 7,83  | 2,93  |
| lmo2157 | lmo2157 | unknown protein                                                                          |                | 3,29  | 5,85  | 2,01  |
| lmo2158 | lmo2158 | similar to B subtilis YwmG protein                                                       | lin2261        | 3,02  | 12,61 |       |
| lmo2175 | lmo2175 | 3-ketoacyl-(acyl-carrier-protein) reductase                                              | lin2278        |       |       | -2,34 |
| lmo2177 | lmo2177 | unknown protein                                                                          | lin2280        | 3,36  | 6,14  | 2,23  |
| srtB    | lmo2181 | sortase B                                                                                | lin2285        |       | 2,44  |       |
| lmo2182 | lmo2182 | similar to ferrichrome ABC transporter (ATP-binding protein)                             | lin2286        |       | 2,77  |       |
| lmo2184 | lmo2184 | similar to ferrichrome ABC transporter (binding protein)                                 | lin2288        |       | 5,11  | 2,56  |
| svpA    | lmo2185 | unknown protein                                                                          | lin2289        | 6,61  | 11,11 |       |
| lmo2186 | lmo2186 | unknown protein                                                                          | lin2290        |       | 2,72  |       |
| pepF    | lmo2188 | similar to oligoendopeptidase                                                            | lin2292        |       | 4,36  |       |
| mecA    | lmo2190 | adaptor protein                                                                          | lin2294, mecA  | 3,55  | 4,49  | 2,18  |
| spxA    | lmo2191 | transcriptional regulator Spx                                                            | lin2295, spxA  |       | 4,53  |       |
| lmo2192 | lmo2192 | similar to oligopeptide ABC transporter (ATP-binding protein)                            | lin2296        | 7,80  | 7,22  |       |
| lmo2193 | lmo2193 | similar to oligopeptide ABC transporter (ATP-binding protein)                            | lin2297        |       | 4,39  |       |
| lmo2194 | lmo2194 | similar to oligopeptide ABC transporter (permease)                                       | lin2298        | 3,37  | 3,36  | 2,48  |
| lmo2195 | lmo2195 | similar to oligopeptide ABC transporter (permease)                                       | lin2299        | 7,32  | 6,47  |       |
| oppA    | lmo2196 | similar to pheromone ABC transporter (binding protein)                                   | lin2300        | 5,20  | 6,16  | 2,73  |
| trpS    | lmo2198 | tryptophanyl-tRNA synthetase                                                             | lin2301, trpS  |       | 3,30  |       |
| lmo2199 | lmo2199 | unknown protein                                                                          | lin2302        | 4,61  | 6,66  |       |
| fabF    | lmo2201 | similar to 3-oxoacyl-acyl-carrier protein synthase                                       | lin2304        |       | 3,90  | 2,03  |
| fabH    | lmo2202 | 3-oxoacyl-(acyl carrier protein) synthase                                                | lin2305        |       | 3,51  |       |
| lmo2203 | lmo2203 | similar to N-acetylmuramoyl-L-alanine amidase                                            | lin2306        |       | 4,50  |       |
| lmo2204 | lmo2204 | unknown protein                                                                          | lin2307        |       | 5,71  |       |
| gpm     | lmo2205 | similar to phosphoglyceromutase 1                                                        | lin2308        | 4,08  | 8,42  | 2,15  |
| clpB    | lmo2206 | similar to endopeptidase Clp ATP-binding chain B (ClpB)                                  | lin2309        |       | 3,90  |       |
| lmo2207 | lmo2207 | unknown protein                                                                          | lin2310        |       | 4,48  |       |
| lmo2208 | lmo2208 | unknown protein                                                                          | lin2311        |       | 2,70  |       |
| lmo2209 | lmo2209 | unknown protein                                                                          | lin2312        | 4,32  | 4,41  |       |
| lmo2210 | lmo2210 | unknown protein                                                                          | lin2313        | 9,23  | 10,20 |       |
| hemH    | lmo2211 | ferrochelatase                                                                           | lin2314        | 4,71  | 6,76  |       |
| lmo2215 | lmo2215 | similar to ABC transporter (ATP-binding protein)                                         | lin2318        |       | 7,42  |       |
| prsA2   | lmo2219 | similar to post-translocation molecular chaperone                                        | lin2322        | 12,02 | 24,00 | 8,95  |
| lmo2223 | lmo2223 | unknown protein                                                                          | lin2326        |       | 3,46  |       |
| cltC    | lmo2225 | similar to fumarate hydratase                                                            | lin2328        |       | 2,34  |       |
| lmo2234 | lmo2234 | unknown protein                                                                          | lin2336        |       | 6,74  |       |
| lmo2235 | lmo2235 | similar to NADH oxidase                                                                  | lin2337        |       | 7,95  |       |
| lmo2251 | lmo2251 | similar to amino acid ABC transporter (ATP-binding protein)                              | lin2353        | 6,92  | 2,22  |       |
| lmo2253 | lmo2253 | similar to phosphoglucomutase                                                            | lin2355        |       | 4,54  |       |
| lmo2254 | lmo2254 | unknown proteins                                                                         | lin2356        |       | 4,85  |       |
| lmo2257 | lmo2257 | hypothetical CDS                                                                         |                | -4,62 |       | -3,99 |
| lmo2263 | lmo2263 | unknown protein                                                                          | lin2364        |       | 3,49  |       |
| addA    | lmo2267 | similar to ATP-dependent deoxyribonuclease (subunit A)                                   | lin2368        |       | 2,59  |       |
| lmo2269 | lmo2269 | unknown protein                                                                          | lin2370        |       | 3,01  |       |
| lmo2276 | lmo2276 | similar to an unknown bacteriophage protein                                              |                |       | 2,61  | -2,72 |
| lmo2277 | lmo2277 | unknown protein                                                                          |                |       |       |       |
| lmo2360 | lmo2360 | transmembrane protein                                                                    | lin2460        |       |       | 2,80  |
| pgi     | lmo2367 | glucose-6-phosphate isomerase                                                            | lin2466, pgi   |       | 5,83  | 2,23  |
| lmo2376 | lmo2376 | similar to peptidyl-prolyl cis-trans isomerase                                           | lin2475        |       | 4,14  |       |
| lmo2384 | lmo2384 | similar to proteins involved in resistance to cholate and to NA(+) and in pH homeostasis | lin2483        |       | 2,83  |       |
| lmo2386 | lmo2386 | similar to B subtilis YuiD protein                                                       | lin2485        |       | 3,63  |       |
| lmo2390 | lmo2390 | similar to hypothetical thioredoxin reductase                                            | lin2489        |       | 2,19  |       |
| lmo2391 | lmo2391 | conserved hypothetical protein similar to B subtilis YhfK protein                        | lin2490        |       | 4,56  |       |
| ltrC    | lmo2398 | low temperature requirement C protein, also similar to B subtilis YutG protein           | lin2497, ltrC  |       | 2,94  |       |
| lmo2399 | lmo2399 | unknown protein                                                                          | lin2498        | 3,09  | 12,36 | 3,39  |
| lmo2411 | lmo2411 | Fe-S cluster assembly protein SufB                                                       | lin2506        |       | 12,44 | 5,12  |
| lmo2412 | lmo2412 | nitrogen fixation protein NifU and related proteins                                      | lin2507        |       | 7,65  | 2,64  |
| lmo2413 | lmo2413 | selenocysteine lyase                                                                     | lin2508        |       | 8,46  | 3,93  |
| lmo2414 | lmo2414 | Fe-S assembly protein SufD                                                               | lin2509        |       |       | 3,78  |
| lmo2415 | lmo2415 | Fe-S cluster assembly ATP-binding protein                                                | lin2510        |       |       | 2,50  |
| gcvH    | lmo2425 | similar to glycine cleavage system protein H                                             | lin2519        |       |       | -2,13 |
| lmo2432 | lmo2432 | unknown protein                                                                          | lin2526        |       |       | -2,39 |
| lmo2437 | lmo2437 | unknown protein                                                                          | lin2531        | -3,20 |       | -4,03 |
| lmo2439 | lmo2439 | unknown protein                                                                          | lin2533        |       | 4,44  |       |
| lmo2454 | lmo2454 | unknown protein                                                                          | lin2548        |       |       | -2,47 |
| pgm     | lmo2456 | phosphoglyceromutase                                                                     | lin2550        |       | 6,29  |       |
| gap     | lmo2459 | glyceraldehyde-3-phosphate dehydrogenase                                                 | lin2553        |       | 4,49  | 2,37  |
| lmo2471 | lmo2471 | similar to NADH oxidase                                                                  | lin2614        |       | 5,00  |       |
| trxB    | lmo2478 | thioredoxin reductase                                                                    | lin2621, trxB  |       | 2,63  |       |
| uvrB    | lmo2489 | excinuclease ABC subunit B                                                               | lin2632, uvrB  |       | 2,91  |       |

|         |         |                                                                                                  |               |       |       |       |
|---------|---------|--------------------------------------------------------------------------------------------------|---------------|-------|-------|-------|
| phoR    | lmo2500 | two-component sensor histidine kinase                                                            | lin2643, phoR |       | 2,52  |       |
| lmo2503 | lmo2503 | similar to cardiolipin synthase                                                                  | lin2646       |       | 3,06  |       |
| spl     | lmo2505 | peptidoglycan lytic protein P45                                                                  | lin2648, spl  |       | 12,21 | 2,68  |
| ftsX    | lmo2506 | highly similar to cell-division protein FtsX                                                     | lin2649       |       |       | 3,88  |
| degU    | lmo2515 | similar to B subtilis two-component response regulator DegU                                      | lin2659       |       |       | 2,11  |
| lmo2518 | lmo2515 | similar to B subtilis putative transcriptional regulator LytR                                    | lin2662       |       | 5,03  |       |
| lmo2522 | lmo2522 | similar to hypothetical cell wall binding protein from B subtilis                                | lin2666       |       | 5,72  | 3,07  |
| lmo2526 | lmo2526 | UDP-N-acetylglucosamine 1-carboxyvinyltransferase                                                | lin2670       |       |       | 2,40  |
| atpD    | lmo2529 | ATP synthase subunit B                                                                           | lin2673       |       | 5,08  | 2,72  |
| fbxA    | lmo2556 | similar to fructose-1,6-bisphosphate aldolase                                                    | lin2701       |       | 5,73  |       |
| lmo2560 | lmo2560 | similar to B subtilis RNA polymerase delta subunit                                               | lin2705       |       |       | 2,06  |
| lmo2574 | lmo2574 | unknown protein                                                                                  | lin2719       |       |       | -2,51 |
| lmo2583 | lmo2583 | similar to two-component response regulator                                                      | lin2728       |       |       | -2,18 |
| lmo2586 | lmo2586 | similar to formate dehydrogenase alpha chain                                                     | lin2731       |       |       | -2,52 |
| rpsI    | lmo2596 | 30S ribosomal protein S9                                                                         | lin2745, rpsI | 3,55  | 9,70  |       |
| rplM    | lmo2597 | 50S ribosomal protein L13                                                                        | lin2746, rplM | 5,02  | 12,78 | 3,29  |
| rpsM    | lmo2608 | 30S ribosomal protein S13                                                                        | lin2757, rpsM |       | 5,49  | 2,62  |
| infA    | lmo2610 | translation initiation factor IF-1                                                               | lin2759       |       | 3,07  |       |
| rplO    | lmo2613 | ribosomal protein L15                                                                            | lin2762, rplO |       | 2,86  |       |
| rplX    | lmo2621 | 50S ribosomal protein L24                                                                        | lin2770, rplX | 6,39  | 5,44  | 2,75  |
| rplV    | lmo2627 | 50S ribosomal protein L22                                                                        | lin2776, rplV | 12,44 | 12,21 |       |
| rplB    | lmo2629 | 50S ribosomal protein L2                                                                         | lin2778, rplB |       |       | 2,05  |
| rplC    | lmo2632 | ribosomal protein L3                                                                             | lin2781, rplC | 8,50  | 8,99  | 3,25  |
| rpsJ    | lmo2633 | 30S ribosomal protein S10                                                                        | lin2782, rpsJ |       |       | 2,22  |
| lmo2642 | lmo2642 | unknown protein                                                                                  | lin2791       |       |       | -2,13 |
| lmo2644 | lmo2644 | unknown protein                                                                                  | lin2793       | -3,30 |       | -2,75 |
| lmo2645 | lmo2645 | unknown protein                                                                                  | lin2794       |       |       | -2,53 |
| lmo2646 | lmo2646 | unknown protein                                                                                  | lin2795       |       |       | -3,67 |
| lmo2648 | lmo2648 | similar to Phosphotriesterase                                                                    | lin2797       | -3,24 | -3,53 | -3,28 |
| ulaA    | lmo2649 | ascorbate-specific PTS system enzyme IIC                                                         | lin2798, ulaA |       |       | -2,76 |
| fus     | lmo2654 | elongation factor EF-2                                                                           | lin2803       | 5,37  | 6,18  | 2,75  |
| rpsG    | lmo2655 | 30S ribosomal protein S7                                                                         | lin2804, rpsG | 4,30  | 4,42  |       |
| dgt     | lmo2657 | deoxyguanosinetriphosphate triphosphohydrolase                                                   | lin2806       |       |       | -2,29 |
| tkt     | lmo2660 | similar to transketolase                                                                         | lin2809       | -3,02 |       | -2,75 |
| lmo2661 | lmo2661 | similar to ribulose-5-phosphate 3-epimerase                                                      | lin2810       | -3,21 |       | -2,81 |
| rpiB-2  | lmo2662 | similar to ribose 5-phosphate epimerase                                                          | lin2811       |       |       | -2,24 |
| lmo2663 | lmo2663 | similar to polyol dehydrogenase                                                                  | lin2812       | -4,79 | -4,12 | -4,56 |
| lmo2664 | lmo2664 | similar to sorbitol dehydrogenase                                                                | lin2813       | -3,84 |       | -3,27 |
| lmo2665 | lmo2665 | similar to PTS system galactitol-specific enzyme IIC component                                   | lin2814       |       |       | -3,08 |
| lmo2669 | lmo2669 | unknown protein                                                                                  | lin2818       |       |       | -2,06 |
| lmo2672 | lmo2672 | weakly similar to transcription regulator                                                        |               |       |       | -2,31 |
| rpiB-4  | lmo2674 | ribose-5-phosphate isomerase B                                                                   | lin2821       |       |       | -2,67 |
| lmo2676 | lmo2676 | similar to UV-damage repair protein                                                              | lin2823       |       |       | -2,11 |
| kdpB    | lmo2681 | potassium-transporting ATPase subunit B                                                          | lin2829, kdpB |       |       | -2,16 |
| murA    | lmo2691 | autolysin, N-acetylmuramidase                                                                    | lin2838       |       | 4,06  |       |
| lmo2692 | lmo2692 | unknown protein                                                                                  | lin2840       |       | 3,91  |       |
| lmo2696 | lmo2696 | similar to hypothetical dihydroxyacetone kinase                                                  | lin2844       |       | 2,49  |       |
| lmo2697 | lmo2697 | unknown protein                                                                                  | lin2845       |       | 3,14  |       |
| recR    | lmo2702 | recombination protein RecR                                                                       | lin2850, recR |       | 2,79  |       |
| lmo2703 | lmo2703 | highly similar to B subtilis YaaK protein                                                        | lin2851       |       | 2,95  |       |
| dnaX    | lmo2704 | highly similar to DNA polymerase III (gamma and tau subunits)                                    | lin2852       |       | 2,76  |       |
| lmo2713 | lmo2713 | secreted protein with 1 GW repeat                                                                | lin2861       | 8,86  | 17,08 | 2,80  |
| lmo2714 | lmo2714 | peptidoglycan anchored protein (LPXTG motif)                                                     | lin2862       | 25,45 | 70,27 | 3,09  |
| cydD    | lmo2715 | highly similar to ABC transporter (ATP-binding protein) required for expression of cytochrome BD | lin2863       |       | 3,04  |       |
| cydA    | lmo2718 | highly similar to cytochrome D ubiquinol oxidase subunit I                                       | lin2866       |       | 3,70  |       |
| lmo2729 | lmo2729 | unknown protein                                                                                  | lin2877       |       | 5,42  |       |
| lmo2730 | lmo2730 | similar to phosphatase                                                                           | lin2878       |       | 2,15  |       |
| lmo2731 | lmo2731 | similar to transcription regulator (RpiR family)                                                 | lin2879       |       | 2,63  |       |
| lmo2733 | lmo2733 | similar to PTS system, fructose-specific IIABC component                                         |               |       |       | -2,35 |
| lmo2736 | lmo2736 | glycerate kinase                                                                                 |               |       |       | -2,48 |
| lmo2741 | lmo2741 | similar to drug-efflux transporters                                                              | lin2884       |       |       | -2,17 |
| lmo2759 | lmo2759 | unknown protein                                                                                  | lin2902       |       |       | -2,36 |
| lmo2761 | lmo2761 | similar to beta-glucosidase                                                                      | lin2904       |       |       | -2,43 |
| lmo2763 | lmo2763 | similar to PTS cellobiose-specific enzyme IIC                                                    | lin2906       |       |       | -2,16 |
| lmo2770 | lmo2770 | putative glutamate--cysteine ligase                                                              | lin2913       |       | 3,14  |       |
| lmo2779 | lmo2779 | similar to probable GTP-binding protein                                                          | lin2919       |       | 3,79  |       |
| kat     | lmo2785 | catalase                                                                                         | lin2920, kat  |       | 6,45  | 2,68  |
| lmo2794 | lmo2794 | chromosome partitioning protein, ParB family                                                     | lin2926       |       | 3,17  |       |
