# Supplementary material for: In Vivo Transcriptional Profiling of Listeria monocytogenes and Mutagenesis Identify New Virulence Factors Involved in Infection
Source: PubMed Central journal article supplement (PMC2679221; doi:10.1371/journal.ppat.1000449), 2009-05-29
Supplement: ppat.1000449.s006.pdf [file ppat.1000449.s006.pdf]

**Table S4.** *L. monocytogenes* EGDe genes encoding proteins of the cell wall subproteome and differentially regulated in the host

| Gene designation | Gene    | Annotation                                                                  | Homolog in <i>L. innocua</i> | Fold change 24h | Fold change 48h | Fold change 72h |
|------------------|---------|-----------------------------------------------------------------------------|------------------------------|-----------------|-----------------|-----------------|
| goxA             | lmo0013 | AA3-600 quinol oxidase subunit II.                                          | lin0013, goxA                |                 | 2,95            |                 |
| inlB             | lmo0434 | Internalin B                                                                |                              |                 | 3,84            | 2,55            |
| lmo0443          | lmo0443 | similar to B. subtilis transcription regulator LytR                         |                              |                 |                 |                 |
| iap              | lmo0582 | P60 extracellular protein, invasion associated protein Iap                  | lin0591, iap                 | 34,54           | 28,64           | 2,04            |
| pdhC             | lmo1054 | dihydrolipoamide dehydrogenase E3 subunit of pyruvate dehydrogenase complex | lin1047                      |                 | 9,00            | 2,25            |
| lmo1291          | lmo1291 | similar to acyltransferase (to B subtilis YrHL protein)                     | lin1329                      |                 | 4,72            |                 |
| frr              | lmo1314 | highly similar to ribosome recycling factors                                | lin1351                      |                 | 2,68            |                 |
| tcsA             | lmo1388 | CD4+ T cell-stimulating antigen, lipoprotein                                | lin1425, tcsA                |                 |                 | 2,19            |
| sod              | lmo1439 | superoxide dismutase.                                                       | lin1478, sod                 | 4,50            | 13,83           |                 |
| dnaK             | lmo1473 | class I heat-shock protein (molecular chaperone) DnaK.                      | lin1510, dnaK                |                 | 6,68            |                 |
| adhE             | lmo1634 | similar to Alcohol-acetaldehyde dehydrogenase.                              | lin1675                      | 4,79            | 12,73           | 3,39            |
| tsf              | lmo1657 | elongation factor Ts EF-Ts                                                  | lin1766, tsf                 |                 | 4,79            | 2,50            |
| lpeA             | lmo1847 | similar to adhesion binding proteins and lipoproteins                       | lin1961                      | 6,54            | 31,12           | 10,63           |
| lmo1967          | lmo1967 | similar to toxic ion resistance proteins                                    | lin2081                      |                 | 4,72            |                 |
| groEL            | lmo2068 | chaperonin GroEL                                                            | lin2174, groEL               |                 | 5,58            | 2,01            |
| prsA2            | lmo2219 | similar to post-translocation molecular chaperone.                          | lin1482; lin2322             | 12,04           | 23,92           | 8,94            |
| lmo2415          | lmo2415 | similar to ABC transporter, ATP-binding protein.                            | lin2510                      |                 |                 | 2,50            |
| gcvH             | lmo2425 | similar to glycine cleavage system protein H                                | lin2519                      |                 |                 | -2,13           |
| pgm              | lmo2456 | phosphoglyceromutase                                                        | lin2550                      |                 | 6,28            |                 |
| gap              | lmo2459 | glyceraldehyde-3-phosphate dehydrogenase                                    | lin2553                      |                 | 4,50            | 2,36            |
| spl              | lmo2505 | peptidoglycan lytic protein P45                                             | lin2648, spl                 |                 | 12,21           | 2,68            |
| fbaA             | lmo2556 | similar to fructose-1,6-bisphosphate aldolase.                              | lin2701                      |                 | 5,74            |                 |
| fus              | lmo2654 | elongation factor EF-2                                                      | lin2803                      | 5,35            | 6,19            | 2,75            |
| murA             | lmo2691 | autolysin, N-acetylmuramidase                                               | lin2838                      |                 | 4,06            |                 |
