# Supplementary material for: In Vivo Transcriptional Profiling of Listeria monocytogenes and Mutagenesis Identify New Virulence Factors Involved in Infection
Source: PubMed Central journal article supplement (PMC2679221; doi:10.1371/journal.ppat.1000449), 2009-05-29
Supplement: ppat.1000449.s007.pdf [file ppat.1000449.s007.pdf]

**Table S5.** *L. monocytogenes* EGDe genes encoding secreted proteins and differentially regulated in the host

| Gene designation                                     | Gene    | Annotation                                                                            | Homolog in <i>L. innocua</i> | Fold change 24h | Fold change 48h | Fold change 72h |
|------------------------------------------------------|---------|---------------------------------------------------------------------------------------|------------------------------|-----------------|-----------------|-----------------|
| <i>Proteins present in culture supernatant [34]</i>  |         |                                                                                       |                              |                 |                 |                 |
| qoxA                                                 | lmo0013 | AA3-600 quinol oxidase subunit II                                                     | lin0013, qoxA                |                 | 2,95            |                 |
| lmo0153                                              | lmo0153 | similar to a probable high-affinity zinc ABC transporter (Zn(II)-binding lipoprotein) | lin0191                      |                 | 5,31            |                 |
| plcA                                                 | lmo0201 | phosphatidylinositol-specific phospholipase c                                         |                              | 7,21            | 48,17           | 6,68            |
| hly                                                  | lmo0202 | listeriolysin O precursor                                                             |                              | 35,51           | 118,60          | 15,14           |
| mpl                                                  | lmo0203 | Zinc metalloproteinase precursor                                                      | lin0694                      | 3,36            | 18,38           | 4,69            |
| actA                                                 | lmo0204 | actin-assembly inducing protein precursor                                             |                              | 6,02            | 15,56           | 4,50            |
| plcB                                                 | lmo0205 | phospholipase C                                                                       |                              | 12,38           | 106,89          | 31,78           |
| rpIL                                                 | lmo0251 | 50S ribosomal protein L7/L12                                                          | lin0283, rpIL                | 4,79            | 5,50            | 2,03            |
| inlH                                                 | lmo0263 | internalin H                                                                          |                              | 3,07            | 6,59            | 2,41            |
| inlA                                                 | lmo0433 | Internalin A                                                                          |                              |                 | 15,89           | 3,86            |
| inlB                                                 | lmo0434 | Internalin B                                                                          |                              |                 | 3,84            | 2,55            |
| lmo0443                                              | lmo0443 | similar to B subtilis transcription regulator LytR                                    | lin0463                      |                 | 2,41            |                 |
| lmo0539                                              | lmo0539 | tagatose 1,6-diphosphate aldolase                                                     | lin0543                      | 18,77           | 24,08           |                 |
| iap                                                  | lmo0582 | P60 extracellular protein, invasion associated protein Iap                            | lin0591, iap                 | 34,54           | 28,64           | 2,04            |
| lmo0644                                              | lmo0644 | unknown protein                                                                       | lin0647                      | 11,63           | 10,41           |                 |
| lmo0796                                              | lmo0796 | unknown protein                                                                       | lin0789                      |                 | 4,20            |                 |
| lmo0927                                              | lmo0927 | hypothetical transmembrane protein                                                    | lin0927                      |                 | 3,18            |                 |
| fri                                                  | lmo0943 | non-heme iron-binding ferritin                                                        | lin0942, fri                 |                 | 13,09           | 4,06            |
| ptsH                                                 | lmo1002 | PTS phosphocarrier protein Hpr (histidine containing protein)                         | lin1001, ptsH                | 2,71            | 4,26            | 2,04            |
| lmo1291                                              | lmo1291 | similar to acyltransferase (to B subtilis YrhL protein)                               | lin1329                      |                 | 4,72            |                 |
| tcsA                                                 | lmo1388 | CD4+ T cell-stimulating antigen, lipoprotein                                          | lin1425, tcsA                |                 |                 | 2,19            |
| lmo1395                                              | lmo1395 | unknown protein                                                                       | lin1432                      |                 | 7,78            | 2,41            |
| sod                                                  | lmo1439 | superoxide dismutase                                                                  | lin1478, sod                 | 4,50            | 13,83           |                 |
| dnaK                                                 | lmo1473 | class I heat-shock protein (molecular chaperone) DnaK                                 | lin1510, dnaK                |                 | 6,68            |                 |
| lmo1521                                              | lmo1521 | similar to N-acetylmuramoyl-L-alanine amidase                                         | lin1556                      |                 | 2,73            |                 |
| tsf                                                  | lmo1657 | elongation factor Ts EF-Ts                                                            | lin1766, tsf                 |                 | 4,79            | 2,50            |
| lmo1752                                              | lmo1752 | unknown protein                                                                       | lin1864                      |                 | 3,43            |                 |
| inlC                                                 | lmo1786 | internalin C                                                                          |                              |                 | 8,57            | 3,58            |
| lpeA                                                 | lmo1847 | similar to adhesion binding proteins and lipoproteins                                 | lin1961                      | 6,54            | 31,12           | 10,63           |
| lmo1851                                              | lmo1851 | similar to carboxy-terminal processing proteinase                                     | lin1965                      |                 |                 | -2,11           |
| lmo1883                                              | lmo1883 | similar to chitinases                                                                 | lin1996                      |                 |                 | -2,45           |
| hup                                                  | lmo1934 | similar to non-specific DNA-binding protein HU                                        | lin2048                      |                 | 5,21            |                 |
| cspB                                                 | lmo2016 | similar to major cold-shock protein                                                   | lin2124                      |                 | 3,66            |                 |
| groEL                                                | lmo2068 | chaperonin GroEL                                                                      | lin2174, groEL               |                 | 5,58            | 2,01            |
| svpA                                                 | lmo2185 | unknown protein                                                                       | lin2289                      | 6,59            | 11,08           |                 |
| lmo2186                                              | lmo2186 | unknown protein                                                                       | lin2290                      |                 | 2,71            |                 |
| oppA                                                 | lmo2196 | similar to pheromone ABC transporter (binding protein)                                | lin2300                      | 5,21            | 6,15            |                 |
| gcvH                                                 | lmo2425 | similar to glycine cleavage system protein H                                          | lin2519                      |                 |                 | -2,13           |
| gap                                                  | lmo2459 | glyceraldehyde-3-phosphate dehydrogenase                                              | lin2553                      |                 | 4,50            | 2,36            |
| spl                                                  | lmo2505 | peptidoglycan lytic protein P45                                                       | lin2648, spl                 |                 | 12,21           | 2,68            |
| lmo2518                                              | lmo2518 | similar to B subtilis putative transcriptional regulator LytR                         | lin2662                      |                 | 5,03            |                 |
| lmo2522                                              | lmo2522 | similar to hypothetical cell wall binding protein from B subtilis                     | lin2666                      |                 | 5,74            | 3,07            |
| kdpB                                                 | lmo2681 | potassium-transporting ATPase subunit B                                               | lin2829, kdpB                |                 |                 | -2,16           |
| murA                                                 | lmo2691 | autolysin, N-acetylmuramidase                                                         | lin2838                      |                 | 4,06            |                 |
| lmo2714                                              | lmo2714 | peptidoglycan anchored protein (LPXTG motif)                                          | lin2862                      | 25,46           | 70,03           | 3,10            |
| <i>Proteins secreted by the SecA2 system [24,36]</i> |         |                                                                                       |                              |                 |                 |                 |
| rpoC                                                 | lmo0259 | DNA-directed RNA polymerase beta' subunit                                             | lin0286, rpoC                |                 | 10,44           | 2,87            |
| iap                                                  | lmo0582 | P60 extracellular protein, invasion associated protein Iap                            | lin0591, iap                 | 34,54           | 28,64           | 2,04            |
| pdhC                                                 | lmo1054 | dihydroliipoamide dehydrogenase E3 subunit of pyruvate dehydrogenase complex          | lin1047                      |                 | 8,99            | 2,25            |
| tcsA                                                 | lmo1388 | CD4+ T cell-stimulating antigen, lipoprotein                                          | lin1425, tcsA                |                 |                 | 2,19            |
| sod                                                  | lmo1439 | superoxide dismutase                                                                  | lin1478, sod                 | 4,50            | 13,83           |                 |
| dnaK                                                 | lmo1473 | class I heat-shock protein (molecular chaperone) DnaK                                 | lin1510, dnaK                |                 | 6,68            |                 |
| groEL                                                | lmo2068 | chaperonin GroEL                                                                      | lin2174, groEL               |                 | 5,58            | 2,01            |
| oppA                                                 | lmo2196 | similar to pheromone ABC transporter (binding protein)                                | lin2300                      | 5,21            | 6,15            | 2,73            |
| rpsI                                                 | lmo2596 | 30S ribosomal protein S9                                                              | lin2745, rpsI                | 3,55            | 9,70            |                 |
| murA                                                 | lmo2691 | autolysin, N-acetylmuramidase                                                         | lin2838                      |                 | 4,06            |                 |
