# Supplementary material for: In Vivo Transcriptional Profiling of Listeria monocytogenes and Mutagenesis Identify New Virulence Factors Involved in Infection
Source: PubMed Central journal article supplement (PMC2679221; doi:10.1371/journal.ppat.1000449), 2009-05-29
Supplement: ppat.1000449.s008.pdf [file ppat.1000449.s008.pdf]

**Table S6.** *L. monocytogenes* EGDe genes involved in DNA metabolism, RNA and protein synthesis, cell division and multiplication, and up-regulated in the host

| Gene designation                                | Gene    | Annotation                                                    | Homolog in <i>L. innocua</i> | Fold change 24h | Fold change 48h | Fold change 72h |
|-------------------------------------------------|---------|---------------------------------------------------------------|------------------------------|-----------------|-----------------|-----------------|
| <i>DNA synthesis</i>                            |         |                                                               |                              |                 |                 |                 |
| hoIB                                            | lmo0162 | DNA polymerase III subunit delta                              | lin0205                      | 3,36            | 5,99            |                 |
| dnaX                                            | lmo2704 | highly similar to DNA polymerase III (gamma and tau subunits) | lin2852                      |                 | 2,76            |                 |
| <i>DNA restriction/modifications and repair</i> |         |                                                               |                              |                 |                 |                 |
| mutL                                            | lmo1404 | DNA mismatch repair protein                                   | lin1441, mutL                |                 | 3,63            |                 |
| tag                                             | lmo1639 | similar to dna-3-methyladenine glycosidase                    | lin1680                      |                 | 4,30            |                 |
| exoA                                            | lmo1782 | similar to 3'-exo-deoxyribonuclease exoA                      | lin1894                      |                 | 2,35            |                 |
| uvrB                                            | lmo2489 | excinuclease ABC subunit B                                    | lin2632, uvrB                |                 | 2,91            |                 |
| <i>DNA recombination</i>                        |         |                                                               |                              |                 |                 |                 |
| recF                                            | lmo0005 | recombination protein F RecF                                  | lin0005, recF                |                 | 2,82            |                 |
| codV                                            | lmo1277 | similar to integrase/recombinase                              | lin1316                      | 5,91            | 2,69            | 18,12           |
| recX                                            | lmo1693 | recombination regulator RecX                                  | lin1801                      |                 | 2,40            |                 |
| addA                                            | lmo2267 | similar to ATP-dependent deoxyribonuclease (subunit A)        | lin2368                      |                 | 2,59            |                 |
| recR                                            | lmo2702 | recombination protein RecR                                    | lin2850, recR                |                 | 2,79            |                 |
| <i>DNA packaging and segregation</i>            |         |                                                               |                              |                 |                 |                 |
| gyrA                                            | lmo0007 | DNA gyrase subunit A                                          | lin0007, gyrA                |                 | 3,11            |                 |
| lmo1606                                         | lmo1606 | similar to DNA translocase                                    | lin1647                      |                 | 7,73            |                 |
| hup                                             | lmo1934 | similar to non-specific DNA-binding protein HU                | lin2048                      |                 | 5,21            |                 |
| lmo2794                                         | lmo2794 | chromosome partitioning protein, ParB family                  | lin2926                      |                 | 3,17            |                 |
| <i>Ribosomal proteins</i>                       |         |                                                               |                              |                 |                 |                 |
| rpsR                                            | lmo0046 | ribosomal protein S18                                         | lin0039, rpsR                |                 | 4,21            |                 |
| rplI                                            | lmo0053 | 50S ribosomal protein L9                                      | lin0046, rplI                |                 | 4,04            | 2,69            |
| rplK                                            | lmo0248 | ribosomal protein L11                                         | lin0280, rplK                | 5,45            | 6,75            | 3,81            |
| rplA                                            | lmo0249 | 50S ribosomal protein L1                                      | lin0281, rplA                | 9,90            | 12,55           | 3,07            |
| rplJ                                            | lmo0250 | ribosomal protein L10                                         | lin0282, rplJ                | 5,69            | 6,92            |                 |
| rplL                                            | lmo0251 | 50S ribosomal protein L7/L12                                  | lin0283, rplL                | 4,79            | 5,49            | 2,03            |
| rpmF-1                                          | lmo0486 | ribosomal protein L32                                         | lin0489, rpmF                |                 | 2,88            |                 |
| rpmA                                            | lmo1540 | 50S ribosomal protein L27                                     | lin1575, rpmA                |                 | 3,96            |                 |
| rplU                                            | lmo1542 | ribosomal protein L21                                         | lin1577, rplU                | 4,71            | 8,12            | 2,22            |
| rpsD                                            | lmo1596 | 30S ribosomal protein S4                                      | lin1638, rpsD                | 7,35            | 14,30           | 3,06            |
| rpsB                                            | lmo1658 | 30S ribosomal protein S2                                      | lin1767, rpsB                |                 | 7,52            | 5,82            |
| rplT                                            | lmo1783 | 50S ribosomal protein L20                                     | lin1895, rplT                |                 | 2,61            |                 |
| rpsP                                            | lmo1797 | ribosomal protein S16                                         | lin1911, rpsP                | 3,17            | 4,96            | 2,01            |
| rpsA                                            | lmo1938 | similar to ribosomal protein S1                               | lin2052                      |                 | 5,25            |                 |
| rpmF-2                                          | lmo2047 | 50S ribosomal protein L32                                     | lin2153, rpmF                |                 | 1,78            |                 |
| rpsI                                            | lmo2596 | 30S ribosomal protein S9                                      | lin2745, rpsI                | 3,55            | 9,70            |                 |
| rplM                                            | lmo2597 | 50S ribosomal protein L13                                     | lin2746, rplM                | 5,02            | 12,78           | 3,29            |
| rpsM                                            | lmo2608 | 30S ribosomal protein S13                                     | lin2757, rpsM                |                 | 5,49            | 2,62            |
| rplO                                            | lmo2613 | ribosomal protein L15                                         | lin2762, rplO                |                 | 2,86            |                 |
| rplX                                            | lmo2621 | 50S ribosomal protein L24                                     | lin2770, rplX                | 6,39            | 5,44            | 2,75            |
| rplV                                            | lmo2627 | 50S ribosomal protein L22                                     | lin2776, rplV                | 12,44           | 12,21           |                 |

|                                                                 |         |                                                                      |               |      |      |
|-----------------------------------------------------------------|---------|----------------------------------------------------------------------|---------------|------|------|
| rplB                                                            | lmo2629 | 50S ribosomal protein L2                                             | lin2778, rplB |      | 2,05 |
| rplC                                                            | lmo2632 | ribosomal protein L3                                                 | lin2781, rplC | 8,50 | 8,99 |
| rpsJ                                                            | lmo2633 | 30S ribosomal protein S10                                            | lin2782, rpsJ |      | 3,25 |
| rpsG                                                            | lmo2655 | 30S ribosomal protein S7                                             | lin2804, rpsG | 4,30 | 4,42 |
| <i>Protein synthesis initiation, elongation and termination</i> |         |                                                                      |               |      |      |
| typA                                                            | lmo1067 | similar to GTP-binding elongation factor                             | lin1055       |      | 6,43 |
| frr                                                             | lmo1314 | highly similar to ribosome recycling factors                         | lin1351       |      | 2,68 |
| tsf                                                             | lmo1657 | elongation factor Ts EF-Ts                                           | lin1766, tsf  |      | 4,79 |
| infC                                                            | lmo1785 | translation initiation factor IF-3                                   | lin1897, infC |      | 5,70 |
| infA                                                            | lmo2610 | translation initiation factor IF-1                                   | lin2759       |      | 3,07 |
| fus                                                             | lmo2654 | elongation factor EF-2                                               | lin2803       | 5,37 | 6,18 |
| <i>Chromosomal replication and segregation</i>                  |         |                                                                      |               |      |      |
| dnaA                                                            | lmo0001 | chromosomal replication initiation protein DnaA                      | lin0001, dnaA |      | 2,38 |
| ssb                                                             | lmo0045 | highly similar to single-strand binding protein (SSB)                | lin0038       |      | 7,98 |
| dnaC                                                            | lmo0054 | replicative DNA helicase DnaC                                        | lin0047       |      | 2,14 |
| dnaB                                                            | lmo1561 | chromosome replication initiation / membrane attachment protein DnaB | lin1596, dnaB |      | 5,31 |
| divIVA                                                          | lmo2020 | similar to cell-division initiation protein (septum placement)       | lin2128       |      | 3,30 |
| <i>Cell elongation and division</i>                             |         |                                                                      |               |      |      |
| spoVG-1                                                         | lmo0196 | similar to B subtilis SpoVG protein                                  | lin0235       |      | 6,61 |
| ftsH                                                            | lmo0220 | highly similar to cell division protein ftsH                         | lin0252       |      | 7,96 |
| mreB                                                            | lmo1547 | similar to cell-shape determining protein MreB                       | lin1581       |      | 2,44 |
| mreC                                                            | lmo1548 | similar to cell-shape determining protein MreC                       | lin1582       |      | 4,07 |
| ftsX                                                            | lmo2506 | highly similar to cell-division protein FtsX                         | lin2649       |      | 3,88 |
