# Supplementary material for: In Vivo Transcriptional Profiling of Listeria monocytogenes and Mutagenesis Identify New Virulence Factors Involved in Infection
Source: PubMed Central journal article supplement (PMC2679221; doi:10.1371/journal.ppat.1000449), 2009-05-29
Supplement: ppat.1000449.s010.pdf [file ppat.1000449.s010.pdf]

**Table S8.** *L. monocytogenes* EGDe genes involved in metabolism and differentially regulated in the host

| Gene designation                  | Gene    | Annotation                                                                                                          |
|-----------------------------------|---------|---------------------------------------------------------------------------------------------------------------------|
| <b>Genes up-regulated in vivo</b> |         |                                                                                                                     |
| lmo0011                           | lmo0011 | similar to mevalonate diphosphate decarboxylase                                                                     |
| lmo0012                           | lmo0012 | similar to mevalonate kinases                                                                                       |
| purA                              | lmo0055 | highly similar to adenylosuccinate synthetase                                                                       |
| lmo0098                           | lmo0098 | similar to PTS system mannose-specific, factor IID                                                                  |
| lmo0153                           | lmo0153 | similar to a probable high-affinity zinc ABC transporter (Zn(II)-binding lipoprotein)                               |
| lmo0169                           | lmo0169 | similar to a glucose uptake protein                                                                                 |
| plcA                              | lmo0201 | phosphatidylinositol-specific phospholipase c                                                                       |
| plcB                              | lmo0205 | phospholipase C                                                                                                     |
| sul                               | lmo0224 | highly similar to dihydropteroate synthases                                                                         |
| folA                              | lmo0225 | highly similar to dihydroneopterin aldolase                                                                         |
| folK                              | lmo0226 | similar to 7,8-dihydro-6-hydroxymethylpterin pyrophosphokinase                                                      |
| lmo0231                           | lmo0231 | similar to arginine kinase                                                                                          |
| lmo0265                           | lmo0265 | similar to succinyldiaminopimelate desuccinylase                                                                    |
| lmo0278                           | lmo0278 | similar to sugar ABC transporter, ATP-binding protein                                                               |
| lmo0279                           | lmo0279 | highly similar to anaerobic ribonucleoside-triphosphate reductase                                                   |
| lmo0280                           | lmo0280 | highly similar to anaerobic ribonucleotide reductase activator protein                                              |
| lmo0301                           | lmo0301 | similar to PTS beta-glucoside-specific enzyme IIA component                                                         |
| lmo0366                           | lmo0366 | conserved hypothetical protein, putative lipoprotein                                                                |
| lmo0541                           | lmo0541 | similar to ABC transporter (binding protein)                                                                        |
| lmo0580                           | lmo0580 | weakly similar to carboxylesterase                                                                                  |
| lmo0593                           | lmo0593 | similar to transport proteins (formate?)                                                                            |
| lmo0594                           | lmo0594 | similar to homoserine O-acetyltransferase                                                                           |
| lmo0607                           | lmo0607 | similar to ABC transporter, ATP-binding protein                                                                     |
| lmo0608                           | lmo0608 | similar to ABC transporter, ATP-binding protein                                                                     |
| lmo0645                           | lmo0645 | similar to amino acid transporter                                                                                   |
| lmo0650                           | lmo0650 | conserved membrane protein                                                                                          |
| thiD                              | lmo0662 | highly similar to phosphomethylpyrimidine kinase thiD                                                               |
| lmo0781                           | lmo0781 | similar to mannose-specific phosphotransferase system (PTS) component IID                                           |
| lmo0782                           | lmo0782 | similar to mannose-specific phosphotransferase system (PTS) component IIC                                           |
| lmo0783                           | lmo0783 | similar to mannose-specific phosphotransferase system (PTS) component IIB                                           |
| lmo0784                           | lmo0784 | similar to mannose-specific phosphotransferase system (PTS) component IIA                                           |
| uhpT                              | lmo0838 | highly similar to hexose phosphate transport protein                                                                |
| lmo0841                           | lmo0841 | similar to cation (calcium) transporting ATPase                                                                     |
| lmo0848                           | lmo0848 | similar to amino acid ABC transporter, ATP-binding protein                                                          |
| lmo0876                           | lmo0876 | similar to PTS system, Lichenan-specific enzyme IIC component                                                       |
| lmo0915                           | lmo0915 | similar to phosphotransferase system enzyme IIC                                                                     |
| lmo0970                           | lmo0970 | similar to enoyl- acyl-carrier protein reductase                                                                    |
| lmo0978                           | lmo0978 | similar to branched-chain amino acid aminotransferase                                                               |
| ptsH                              | lmo1002 | PTS phosphocarrier protein Hpr (histidine containing protein)                                                       |
| lmo1003                           | lmo1003 | phosphotransferase system enzyme I                                                                                  |
| lmo1006                           | lmo1006 | similar to aminotransferases (to <i>B. subtilis</i> PatA protein)                                                   |
| lmo1011                           | lmo1011 | similar to tetrahydrodipicolinate succinylase                                                                       |
| lmo1086                           | lmo1086 | similar to CDP-ribitol pyrophosphorylase                                                                            |
| lmo1087                           | lmo1087 | similar to glucitol dehydrogenase                                                                                   |
| lmo1093                           | lmo1093 | similar to NH(3)-dependent NAD(+) synthetases, nitrogen regulatory protein                                          |
| guaA                              | lmo1096 | highly similar to GMP synthetase                                                                                    |
| lmo1207                           | lmo1207 | similar to cobalt transport ATP-binding protein CbiO                                                                |
| lmo1250                           | lmo1250 | similar to antibiotic resistance protein                                                                            |
| glnA                              | lmo1299 | highly similar to glutamine synthetases                                                                             |
| lmo1354                           | lmo1354 | similar to aminopeptidase P                                                                                         |
| tcsA                              | lmo1388 | CD4+ T cell-stimulating antigen, lipoprotein                                                                        |
| lmo1424                           | lmo1424 | similar to manganese transport proteins NRAMP                                                                       |
| opuCD                             | lmo1425 | similar to betaine/carnitine/choline ABC transporter (membrane p)                                                   |
| lmo1431                           | lmo1431 | similar to ABC transporter (ATP-binding protein)                                                                    |
| udk                               | lmo1497 | similar to Uridine kinase                                                                                           |
| lmo1536                           | lmo1536 | similar to prephenate dehydratase PheA                                                                              |
| lmo1578                           | lmo1578 | similar to X-Pro dipeptidase                                                                                        |
| lmo1592                           | lmo1592 | similar to thiamin biosynthesis protein ThiI                                                                        |
| aroA                              | lmo1600 | 3-deoxy-D-arabino-heptulosonate 7-phosphate synthase                                                                |
| menD                              | lmo1675 | similar to 2-succinyl-6-hydroxy-2,4-cyclohexadiene-1-carboxylate synthase / 2-oxoglutarate decarboxylase            |
| lmo1677                           | lmo1677 | similar to menaquinone biosynthesis proteins                                                                        |
| lmo1705                           | lmo1705 | similar to deoxyguanosine kinase/deoxyadenosine kinase(I) subunit                                                   |
| lmo1711                           | lmo1711 | highly similar to aminopeptidases                                                                                   |
| adeC                              | lmo1742 | highly similar to adenine deaminases                                                                                |
| lmo1761                           | lmo1761 | similar to putative sodium-dependent transporter                                                                    |
| purD                              | lmo1764 | phosphoribosylglycinamide synthetase                                                                                |
| lmo1780                           | lmo1780 | similar to aminotripeptidase (peptidase T)                                                                          |
| lmo1847                           | lmo1847 | similar to adhesion binding proteins and lipoproteins with multiple specificity for metal cations (ABC transporter) |
| lmo1848                           | lmo1848 | similar metal cations ABC transporter (permease protein)                                                            |
| lmo1849                           | lmo1849 | similar to metal cations ABC transporter, ATP-binding proteins                                                      |
| ilvN                              | lmo1985 | similar to acetolactate synthase (acetohydroxy-acid synthase) (small subunit)                                       |
| nadC                              | lmo2024 | similar to nicotinate-nucleotide pyrophosphorylase                                                                  |
| nadA                              | lmo2025 | similar to quinolinate synthetase                                                                                   |
| ctaA                              | lmo2058 | similar to heme O oxygenase                                                                                         |
| lmo2077                           | lmo2077 | similar to glycoprotease                                                                                            |
| lmo2101                           | lmo2101 | similar to a protein required for pyridoxine synthesis                                                              |
| lmo2114                           | lmo2114 | similar to ABC transporter (ATP-binding protein)                                                                    |
| lmo2115                           | lmo2115 | similar to ABC transporter (permease)                                                                               |
| lmo2154                           | lmo2154 | similar to ribonucleoside-diphosphate reductase, subunit beta                                                       |
| lmo2155                           | lmo2155 | similar to ribonucleoside-diphosphate reductase, subunit alpha                                                      |
| lmo2182                           | lmo2182 | similar to ferrichrome ABC transporter (ATP-binding protein)                                                        |
| lmo2184                           | lmo2184 | similar to ferrichrome ABC transporter (binding protein)                                                            |
| lmo2188                           | lmo2188 | similar to oligoendopeptidase                                                                                       |
| lmo2192                           | lmo2192 | similar to oligopeptide ABC transporter (ATP-binding protein)                                                       |
| lmo2193                           | lmo2193 | similar to oligopeptide ABC transporter (ATP-binding protein)                                                       |
| lmo2194                           | lmo2194 | similar to oligopeptide ABC transporter (permease)                                                                  |
| lmo2195                           | lmo2195 | similar to oligopeptide ABC transporter (permease)                                                                  |
| lmo2196                           | lmo2196 | similar to pheromone ABC transporter (binding protein)                                                              |
| lmo2201                           | lmo2201 | similar to 3-oxoacyl-acyl-carrier protein synthase                                                                  |
| lmo2202                           | lmo2202 | similar to 3-oxoacyl- acyl-carrier protein synthase                                                                 |
| hemH                              | lmo2211 | similar to ferrochelatase                                                                                           |

|         |         |                                                                                                                |
|---------|---------|----------------------------------------------------------------------------------------------------------------|
| lmo2215 | lmo2215 | similar to ABC transporter (ATP-binding protein)                                                               |
| lmo2251 | lmo2251 | similar to amino acid ABC transporter (ATP-binding protein)                                                    |
| lmo2413 | lmo2413 | similar to aminotransferase                                                                                    |
| lmo2414 | lmo2414 | similar to aminotransferase                                                                                    |
| lmo2415 | lmo2415 | similar to ABC transporter, ATP-binding protein                                                                |
| lmo2503 | lmo2503 | similar to cardiolipin synthase                                                                                |
| cydD    | lmo2715 | highly similar to ABC transporter (ATP-binding protein) required for expression of cytochrome BD               |
| lmo2770 | lmo2770 | similar to gamma-glutamylcysteine synthetase (N-terminal part) and to cyanophycin synthetase (C-terminal part) |

**Genes down-regulated in vivo**

|         |         |                                                                                             |
|---------|---------|---------------------------------------------------------------------------------------------|
| lmo0023 | lmo0023 | similar to PTS system, fructose-specific IIC component                                      |
| lmo0024 | lmo0024 | similar to PTS system, mannose-specific IID component                                       |
| lmo0033 | lmo0033 | similar to endoglucanase                                                                    |
| lmo1142 | lmo1142 | similar to Salmonella enterica PduS protein                                                 |
| lmo1143 | lmo1143 | similar to Salmonella enterica PduT protein                                                 |
| lmo1144 | lmo1144 | similar to Salmonella enterica PduU protein                                                 |
| lmo1145 | lmo1145 | similar to Salmonella enterica PduV protein                                                 |
| lmo1147 | lmo1147 | similar to bifunctional cobalamin biosynthesis protein CopB                                 |
| lmo1148 | lmo1148 | highly similar to cobalamin (5'-phosphatase) synthetase                                     |
| lmo1149 | lmo1149 | similar to alpha-ribazole-5'-phosphatase                                                    |
| lmo1151 | lmo1151 | similar to Salmonella typhimurium PduA protein                                              |
| lmo1152 | lmo1152 | similar to Salmonella typhimurium PduB protein                                              |
| lmo1153 | lmo1153 | highly similar to propanediol dehydratase, alpha subunit                                    |
| lmo1154 | lmo1154 | similar to diol dehydrase (diol dehydratase) gamma subunit                                  |
| lmo1156 | lmo1156 | similar to diol dehydratase-reactivating factor large subunit                               |
| lmo1157 | lmo1157 | similar to diol dehydratase-reactivating factor small chain                                 |
| lmo1158 | lmo1158 | similar to Salmonella enterica PduK protein                                                 |
| lmo1159 | lmo1159 | similar to carboxysome structural protein                                                   |
| lmo1160 | lmo1160 | similar to Salmonella enterica PduL protein                                                 |
| lmo1161 | lmo1161 | similar to ethanolamine utilization protein EutJ                                            |
| lmo1164 | lmo1164 | highly similar to Salmonella enterica PduO protein                                          |
| lmo1165 | lmo1165 | similar to ethanolamine utilization protein EutE                                            |
| lmo1166 | lmo1166 | similar to NADPH-dependent butanol dehydrogenase                                            |
| glpF    | lmo1167 | similar to glycerol uptake facilitator protein                                              |
| AckA2   | lmo1168 | similar to acetate kinase                                                                   |
| cobD    | lmo1169 | similar to Salmonella typhimurium CobD protein and to histidinol-phosphate aminotransferase |
| pduQ    | lmo1171 | similar to NADPH-dependent butanol dehydrogenase                                            |
| lmo1173 | lmo1173 | similar to two-component sensor histidine kinase                                            |
| eutA    | lmo1174 | similar to ethanolamine utilization protein EutA (putative chaperonin)                      |
| eutB    | lmo1175 | similar to ethanolamine ammonia-lyase, heavy chain                                          |
| eutC    | lmo1176 | similar to ethanolamine ammonia-lyase, light chain                                          |
| lmo1177 | lmo1177 | similar to putative carboxysome structural protein (eutL)                                   |
| lmo1180 | lmo1180 | similar to putative carboxysome structural protein                                          |
| lmo1181 | lmo1181 | similar to cobalamin adenosyl transferase                                                   |
| lmo1182 | lmo1182 | similar to Salmonella enterica PduL protein                                                 |
| cbiA    | lmo1191 | similar to cobyrinic acid a,c-diamide synthase                                              |
| lmo1192 | lmo1192 | similar to cobalamin synthesis protein CbiB                                                 |
| cbiD    | lmo1194 | similar to cobalamin biosynthesis protein CbiD                                              |
| lmo1728 | lmo1728 | some similarities to cellobiose-phosphorylase                                               |
| lmo1812 | lmo1812 | similar to L-serine dehydratase                                                             |
| lmo1817 | lmo1817 | weakly similar to thiamin pyrophosphokinase                                                 |
| lmo1818 | lmo1818 | similar to ribulose-5-phosphate 3-epimerase (PPP)                                           |
| lmo1825 | lmo1825 | similar to pantothenate metabolism flavoprotein homolog                                     |
| pyrE    | lmo1831 | highly similar to orotate phosphoribosyltransferases                                        |
| pyrF    | lmo1832 | highly similar to orotidine 5'-phosphate decarboxylases                                     |
| pyrD    | lmo1833 | highly similar to dihydroorotase dehydrogenase                                              |
| pyrDII  | lmo1834 | highly similar to dihydroorotate dehydrogenase (electron transfer subunit)                  |
| pyrAB   | lmo1835 | highly similar to carbamoyl-phosphate synthetase (catalytic subunit)                        |
| pyrAa   | lmo1836 | highly similar to carbamoyl-phosphate synthetase (glutaminase subunit)                      |
| pyrC    | lmo1837 | highly similar to dihydroorotase                                                            |
| pyrP    | lmo1839 | highly similar to uracil permease                                                           |
| lmo1851 | lmo1851 | similar to carboxy-terminal processing proteinase                                           |
| lmo1871 | lmo1871 | similar to phosphoglucomutases                                                              |
| lmo1883 | lmo1883 | similar to chitinases                                                                       |
| lmo2175 | lmo2175 | similar to dehydrogenase                                                                    |
| lmo2425 | lmo2425 | similar to glycine cleavage system protein H                                                |
| lmo2586 | lmo2586 | similar to formate dehydrogenase alpha chain                                                |
| lmo2648 | lmo2648 | similar to Phosphotriesterase                                                               |
| lmo2649 | lmo2649 | similar to hypothetical PTS enzyme IIC component                                            |
| lmo2657 | lmo2657 | similar to dGTP triphosphohydrolase                                                         |
| lmo2660 | lmo2660 | similar to transketolase (PPP)                                                              |
| lmo2661 | lmo2661 | similar to ribulose-5-phosphate 3-epimerase (PPP)                                           |
| lmo2662 | lmo2662 | similar to ribose 5-phosphate epimerase (PPP)                                               |
| lmo2663 | lmo2663 | similar to polyol dehydrogenase                                                             |
| lmo2664 | lmo2664 | similar to sorbitol dehydrogenase                                                           |
| lmo2665 | lmo2665 | similar to PTS system galactitol-specific enzyme IIC component                              |
| lmo2674 | lmo2674 | similar to ribose 5-phosphate epimerase (PPP)                                               |
| kdpB    | lmo2681 | potassium-transporting atpase b chain                                                       |
| lmo2733 | lmo2733 | similar to PTS system, fructose-specific IIABC component                                    |
| lmo2741 | lmo2741 | similar to drug-efflux transporters                                                         |
| lmo2761 | lmo2761 | similar to beta-glucosidase                                                                 |
| lmo2763 | lmo2763 | similar to PTS cellobiose-specific enzyme IIC                                               |
