# Supplementary material for: In Vivo Transcriptional Profiling of Listeria monocytogenes and Mutagenesis Identify New Virulence Factors Involved in Infection
Source: PubMed Central journal article supplement (PMC2679221; doi:10.1371/journal.ppat.1000449), 2009-05-29
Supplement: ppat.1000449.s011.pdf [file ppat.1000449.s011.pdf]

**Table S9 - Primers**

**Primers used for construction of mutants**

| Name      | Sequence (5' to 3')                                                               | Restriction site |
|-----------|-----------------------------------------------------------------------------------|------------------|
| lmo1081-F | <i>GGAGTCT</i> TGATTTATTATCCGCTATCG                                               | SacI             |
| lmo1081-R | AT <i>GGTTCGAC</i> CAATTCCTCAAGACAAGCG                                            | Sall             |
| lmo1082-A | TAC <i>GGTTCGAC</i> TGCTCAAATCGATGCTGG                                            | Sall             |
| lmo1082-B | CGA <i>CGCGT</i> CATTCTTTTCTCTCC                                                  | MluI             |
| lmo1082-C | CGA <i>CGCGT</i> TAAATGAATTTATTAG                                                 | MluI             |
| lmo1082-D | TACAGATCT TAGTGGTCTCCACCAAGC                                                      | BglII            |
| lmo1102-A | CGA <i>GGTTCGAC</i> TTCCACTATCAAAGTGG                                             | Sall             |
| lmo1102-B | CGA <i>AITC</i> CACGTTCTTAAACACTCC                                                | EcoRI            |
| lmo1102-C | CGA <i>AITC</i> TAAAAAATCTTCAAACAC                                                | EcoRI            |
| lmo1102-D | CGCAGATCT AATTCGTACAAGACATACC                                                     | BglII            |
| lmo2219-F | <i>GGAGTCT</i> AAAGACGAACCTTATGACGC                                               | SacI             |
| lmo2219-R | AT <i>GGTTCGAC</i> TGAGACTAAGGTAAGAAGC                                            | Sall             |
| lmo2459-A | <i>GGAATTC</i> ATGACAGTTAAAGTTGGTATTAATGG                                         | EcoRI            |
| lmo2459-B | <i>ACGGTACC</i> TTACGCCCTAAAGAGAACACGCCAATAGCTAACATTGCAAGAATTAATTATTTAGCGATTTTTGC | KpnI             |
| lmo2459-C | <i>GCTAGA</i> GAAGTGTAGTACATCAGC                                                  | XbaI             |
| lmo2459-D | AT <i>GCTGCAG</i> AGTTCGAATACGCCATTGG                                             | PstI             |
| lmo2713-F | CGA <i>AITC</i> TAAGTACCTCGGTTACG                                                 | EcoRI            |
| lmo2713-R | ATAGTTCGAC AGCGACGCAACCTAATGTG                                                    | Sall             |
| lmo2714-F | <i>GGAATTC</i> GACAGAACCAGCAGAACC                                                 | EcoRI            |
| lmo2714-R | ATAGTTCGAC TGGAGCTGTTACGACTGC                                                     | Sall             |

**Primers used for verification of mutagenesis**

| Name      | Sequence (5' to 3')          |
|-----------|------------------------------|
| lmo1081-F | CCATTGCCATTTCAGGCTGCG        |
| lmo1081-R | TACAGATCTTAGTGGTCTCCACCAAGC  |
| lmo1082-F | CCACTCTCTTCTGTGGAAGC         |
| lmo1082-R | ATCATAAATTGGCCCTGTCC         |
| lmo1102-F | AAGCCCTATCTGAAGAACTAGG       |
| lmo1102-R | CGCTACTGTTGATTTACAAATG       |
| lmo2219-F | CCATTGCCATTTCAGGCTGCG        |
| lmo2219-R | CGCAGATCTGTTGGAGAAACAGTAGACC |
| lmo2713-F | CCATTGCCATTTCAGGCTGCG        |
| lmo2713-R | AGCTCTCCATTACTCCAACC         |
| lmo2714-F | CCATTGCCATTTCAGGCTGCG        |
| lmo2714-R | AGTAGGTTGTTGCGGTAGTGC        |

**Primers used for construction of complemented strains**

| Name      | Sequence (5' to 3')             | Restriction site |
|-----------|---------------------------------|------------------|
| lmo1082-G | CGACTAGT AGCGTTACCTTGAACCTGGGAG | SpeI             |
| lmo1082-H | ATAGTTCGAC CAATAAACCTGCCACCTG   | Sall             |
| lmo1102-G | GCCACTAGT AACCTGTTTACACACAAGC   | SpeI             |
| lmo1102-H | ACCGTTCGAC TAGTCCGTGACTCTTTAGAC | Sall             |
| lmo2714-G | AGTCTGCAG TAATGGCAGAAGAACCACGC  | PstI             |
| lmo2714-H | AGTCTGCAG AAAGGAGTGACCAAGTAGGC  | Sall             |
| lmo2459-G | ATACTGCAG CTTACGATTAGTACAATCCG  | PstI             |
| lmo2459-H | ATAGTTCGAC TAGCCATTAGAGTTCTCC   | Sall             |

**Primers used for qPCR**

| Name      | Sequence (5' to 3')        |
|-----------|----------------------------|
| lmo0206-F | CCATTTTCATTAAAGCGATGC      |
| lmo0206-R | TCCAGCTATATCACCTTTTCC      |
| lmo1081-F | CTTATGGGCAGAGGATTGCT       |
| lmo1081-R | GCAGCCTCATCAATATACCC       |
| lmo1082-F | CCACTCTCTTCTGTGGAAGC       |
| lmo1082-R | ATCATAAATTGGCCCTGTCC       |
| lmo1102-F | AAGCCCTATCTGAAGAACTAGG     |
| lmo1102-R | CGCTACTGTTGATTTACAAATG     |
| lmo1290-F | TTACAGTTGATGACGGAAACG      |
| lmo1290-R | CCGTGCGTTGTAATTGTTAGGC     |
| lmo2219-F | CAATACGGATACACATCATCC      |
| lmo2219-R | TGTCTTCCACTTTCACGTTAGC     |
| lmo2713-F | AAAGCACTACCGCAACAACC       |
| lmo2713-R | CCATTTGCCGATATGACTGG       |
| lmo2714-F | TGGAGAAGGAACAACAACCTGC     |
| lmo2714-R | TTTCGCTGGGACTTGATAGG       |
| fri-F     | ACTAGCAATCGGCGGAAGC        |
| fri-R     | TCGCCTTCTTGTCACTAAGC       |
| oppA-F    | AGCGCACTAATTCCTTCTGC       |
| oppA-R    | GTCAGGCGCATATAGACCTTCG     |
| sigB-F    | AGAAACGGGTGAACACTCTCG      |
| sigB-R    | CTTCTCATTTCTGCAACGCC       |
| iniA-F    | ACAACCTGGAGGAACGCGCC       |
| iniA-R    | CCAGGTATATTTGCGGAAGG       |
| prfA-F    | TCATTAGCGAGCAGGCTACC       |
| prfA-R    | GCAAATAGAGCCAAGCTTCC       |
| 16S-F     | CTCGTGTGCTGAGATGTTGG       |
| 16S-R     | CGTGTGTAGCCAGGTCATA        |
| hly-F     | CGTCCATCTATTTGCCAGGT       |
| hly-R     | ATTTCCGATAAAGCGTGGTG       |
| murA-F    | AGCGCAGACGAAACAGCGCC       |
| murA-R    | AGGAGTGGCCGTTGCTGATGC      |
| iniH-F    | CG CAA ATT ACA GAT GTG ACC |
| iniH-R    | TT AGT TAG TCC TGC AAG CGG |
| sod-F     | GCTGGTCACTCCTGAACTTGC      |
| sod-R     | CCACCGTGGTTACGGACAGC       |
| ami-F     | TGCTGCTTCCATTGATCCGGTGC    |
| ami-R     | GCGCGAAGCAAAGGACTTGC       |
| lpeA-F    | CCAGCCAACATTCAAAGTGC       |
| lpeA-R    | CGATCAAACCAACCGTTCCC       |
| iap-F     | GCGCCAACAATCGCATCCGC       |
| iap-R     | TCAACACCAGCGCCACTACGG      |
| gap-F     | CTGCTCAACGTGTTCCAGTTCC     |
| gap-R     | GCTTCCATAGCTGCATTTACTTCC   |
